# Supplementary material for: Synthesis of Potential Antiviral Agents for SARS-CoV-2 Using Molecular Hybridization Approach
Source: MDPI journal article supplement (doi:10.3390/molecules27185923), 2022-09-12

## **Supporting Information**

### **Synthesis of Potential Antiviral Agents for SARS-CoV-2 using Molecular Hybridization Approach**

Kailey A. Wyman,<sup>a</sup> Adel S. Girgis,<sup>b</sup> Pragnakiran Surapaneni,<sup>a,c</sup> Jade M. Moore,<sup>a</sup> Noura M. Abo Shama,<sup>d</sup> Sara H. Mahmoud,<sup>d</sup> Ahmed Mostafa,<sup>d</sup> Reham F. Barghash,<sup>b</sup> Zou Juan,<sup>a</sup> Radha D. Dobaria,<sup>a</sup> Ahmad J. Almalki,<sup>e</sup> Tarek S. Ibrahim,<sup>e</sup> Siva S. Panda,<sup>a,\*</sup>

*<sup>a</sup>Department of Chemistry and Physics, Augusta University, Augusta, GA, 30912, USA*

*<sup>b</sup>Department of Pesticide Chemistry, National Research Centre, Dokki, Giza, 12622, Egypt*

*<sup>c</sup>Schulich School of Medicine and Dentistry, Western University, London, ON, N6A5C1, Canada*

*<sup>d</sup>Center of Scientific Excellence for Influenza Viruses, National Research Centre, Giza 12622, Egypt*

*<sup>e</sup>Department of Pharmaceutical Chemistry, Faculty of Pharmacy, King Abdulaziz University, Jeddah 21589, Saudi Arabia*

*\*Corresponding author, E-mail address: [sipanda@augusta.edu](mailto:sipanda@augusta.edu), [sspanda12@gmail.com](mailto:sspanda12@gmail.com)*

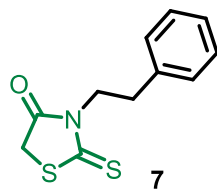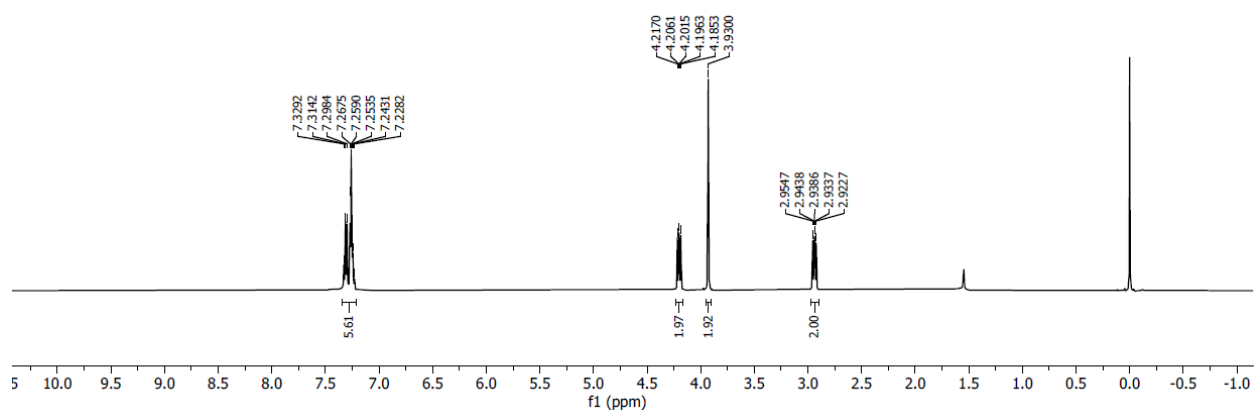

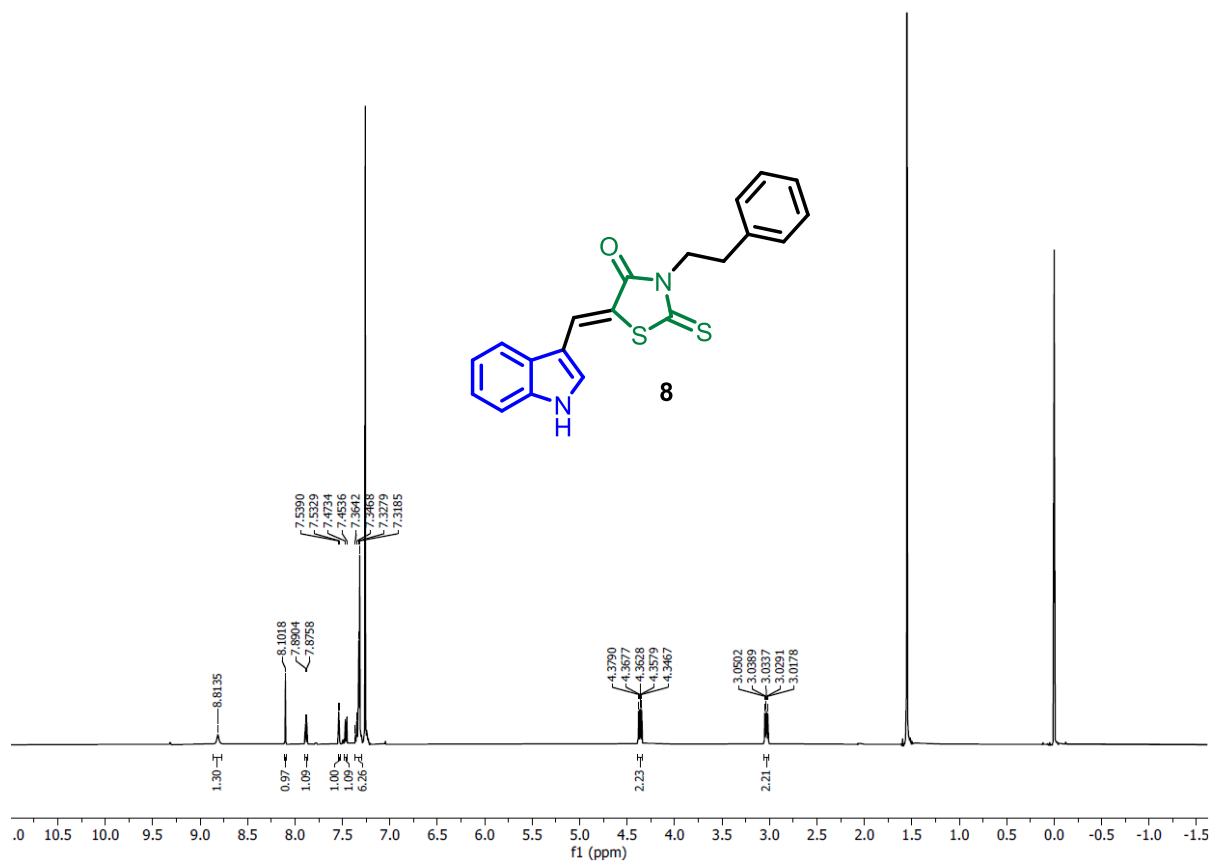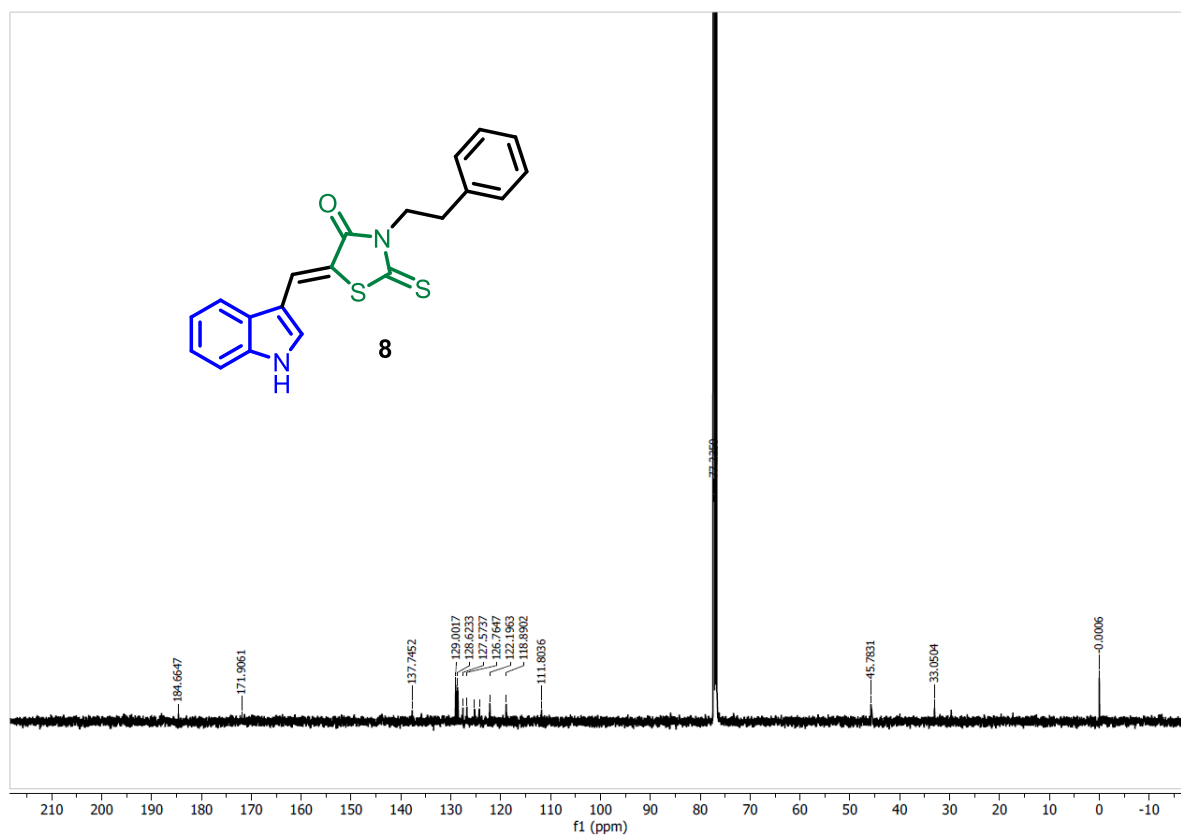

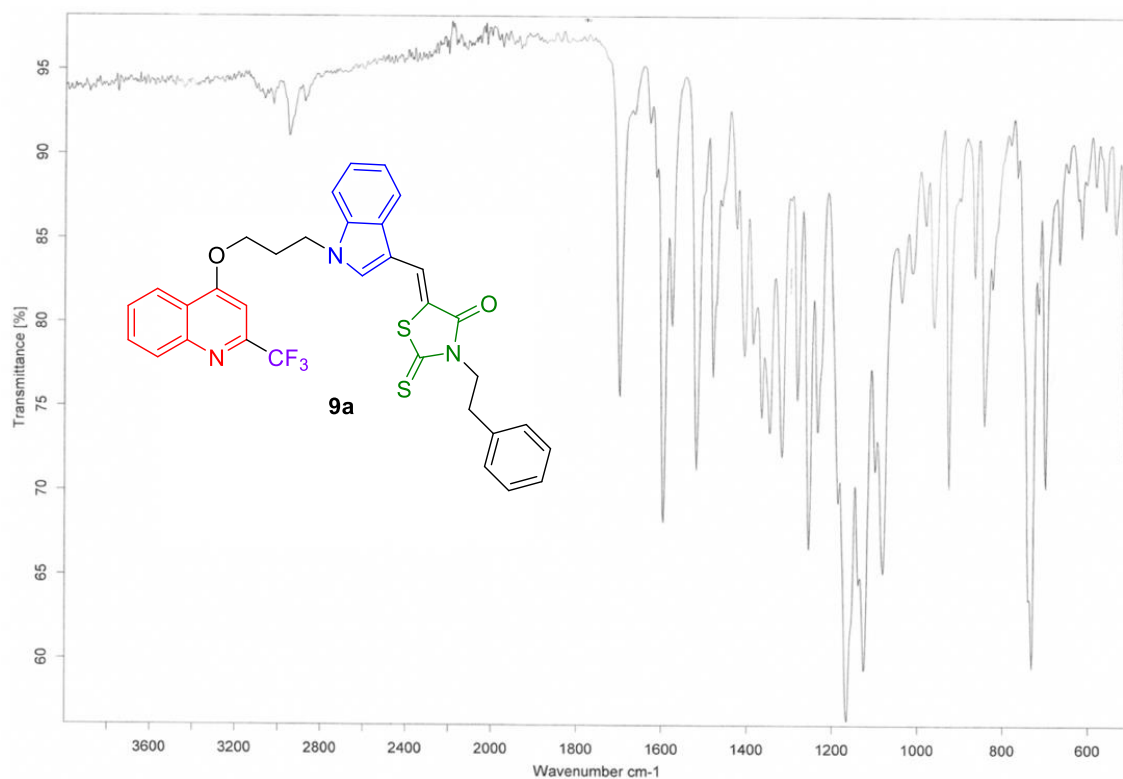

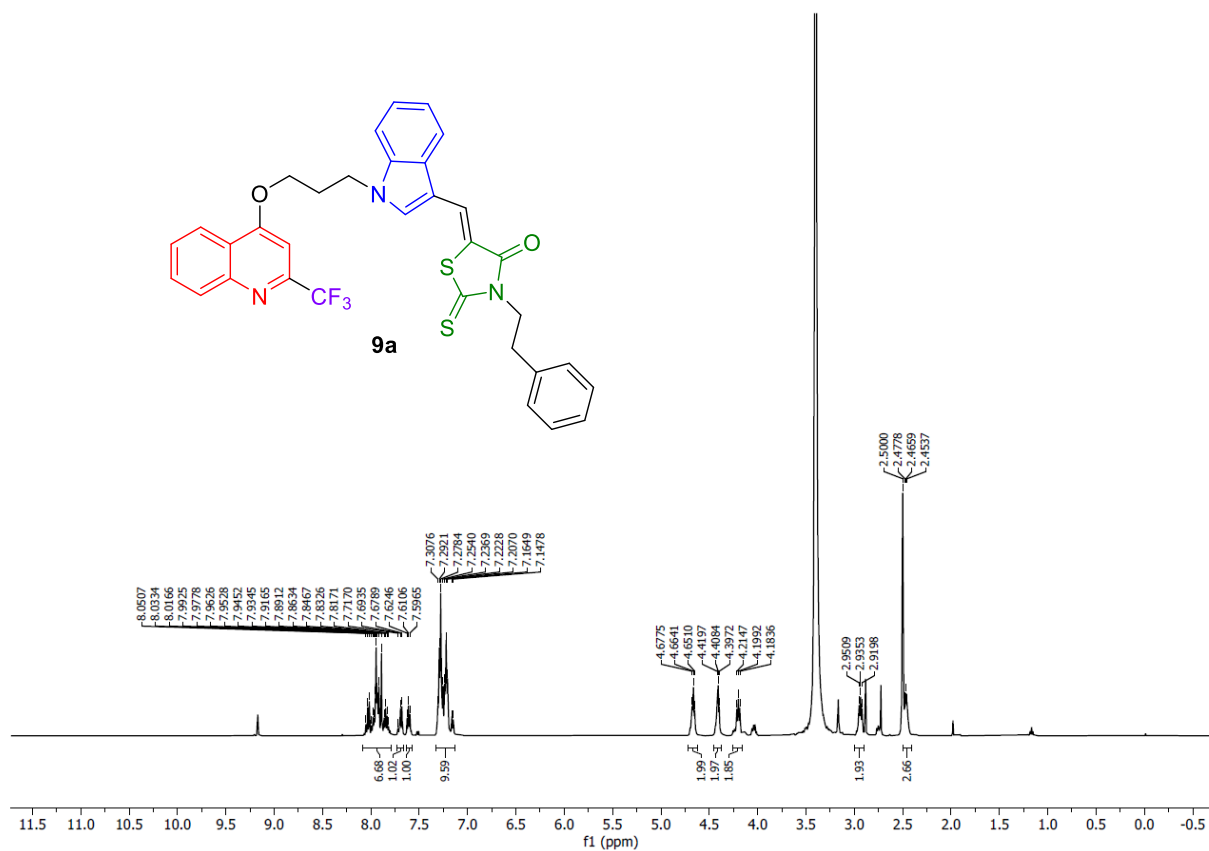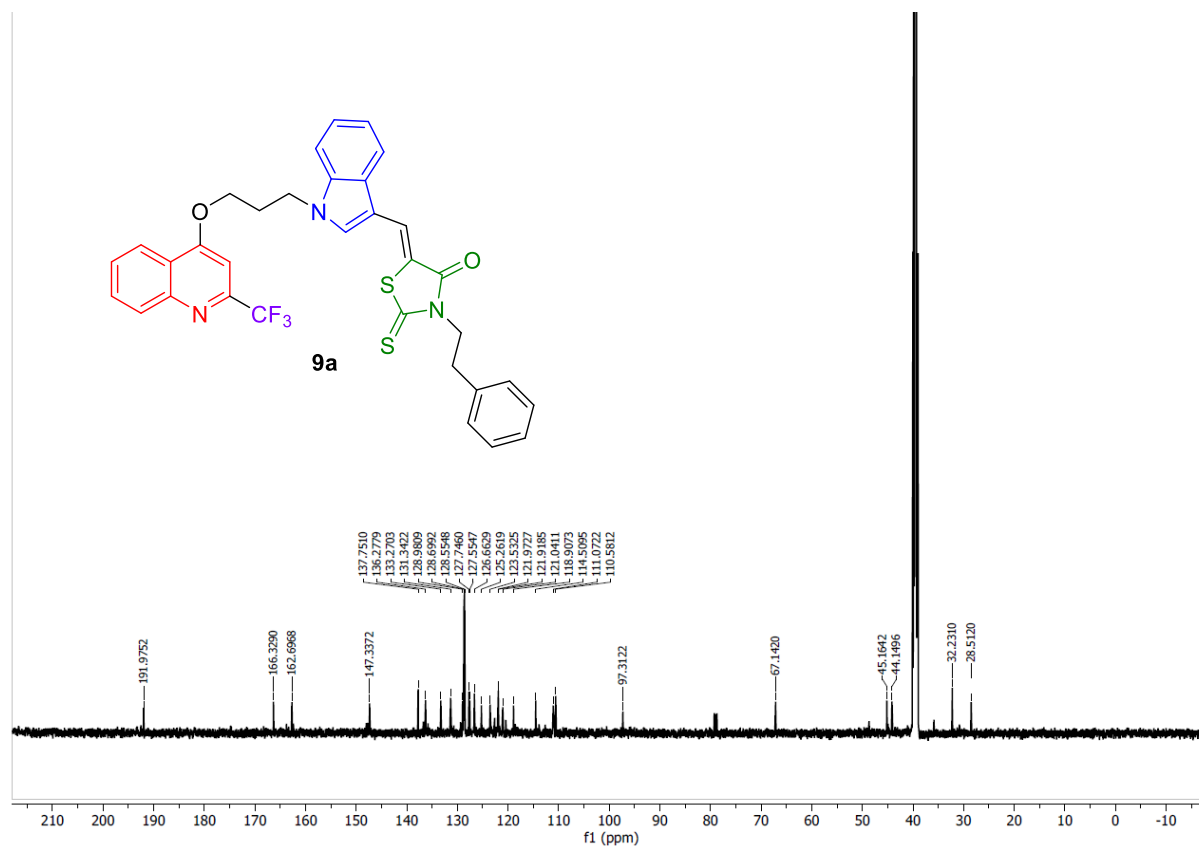

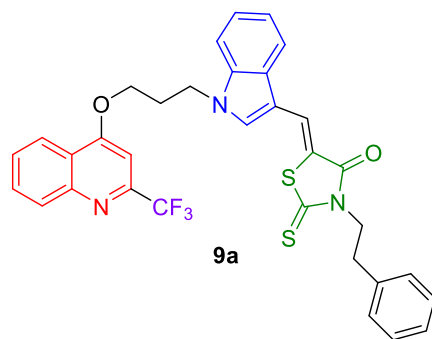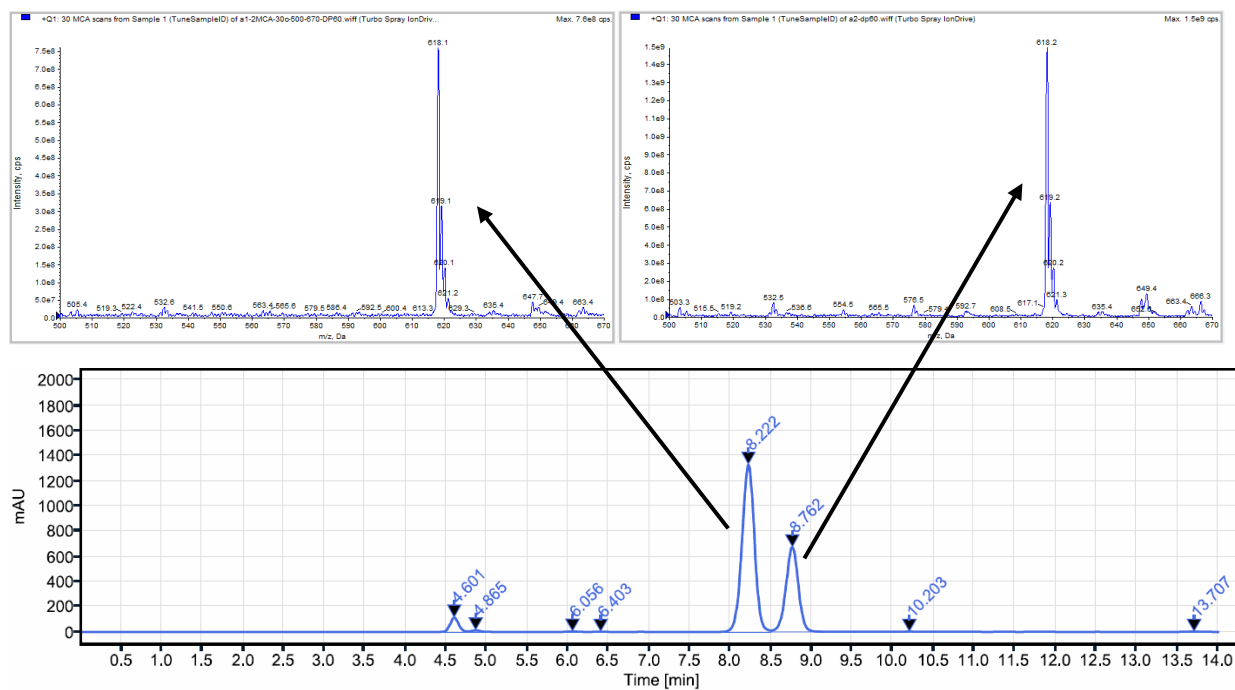

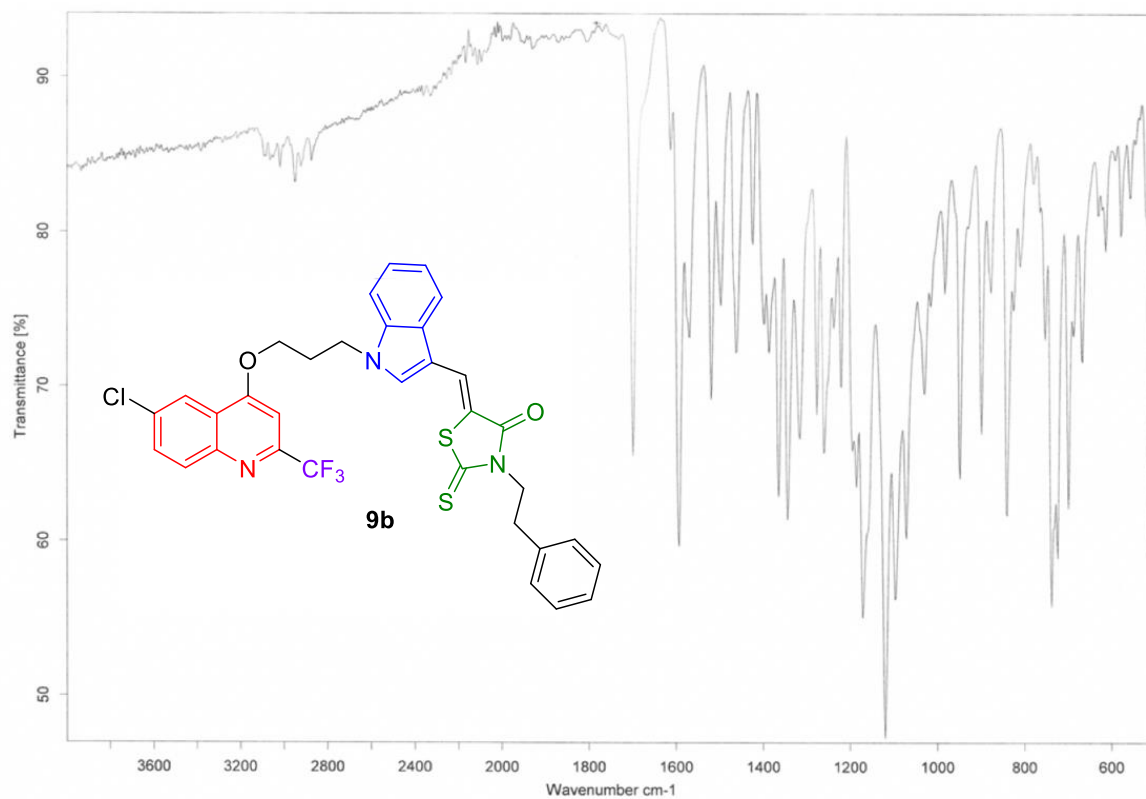

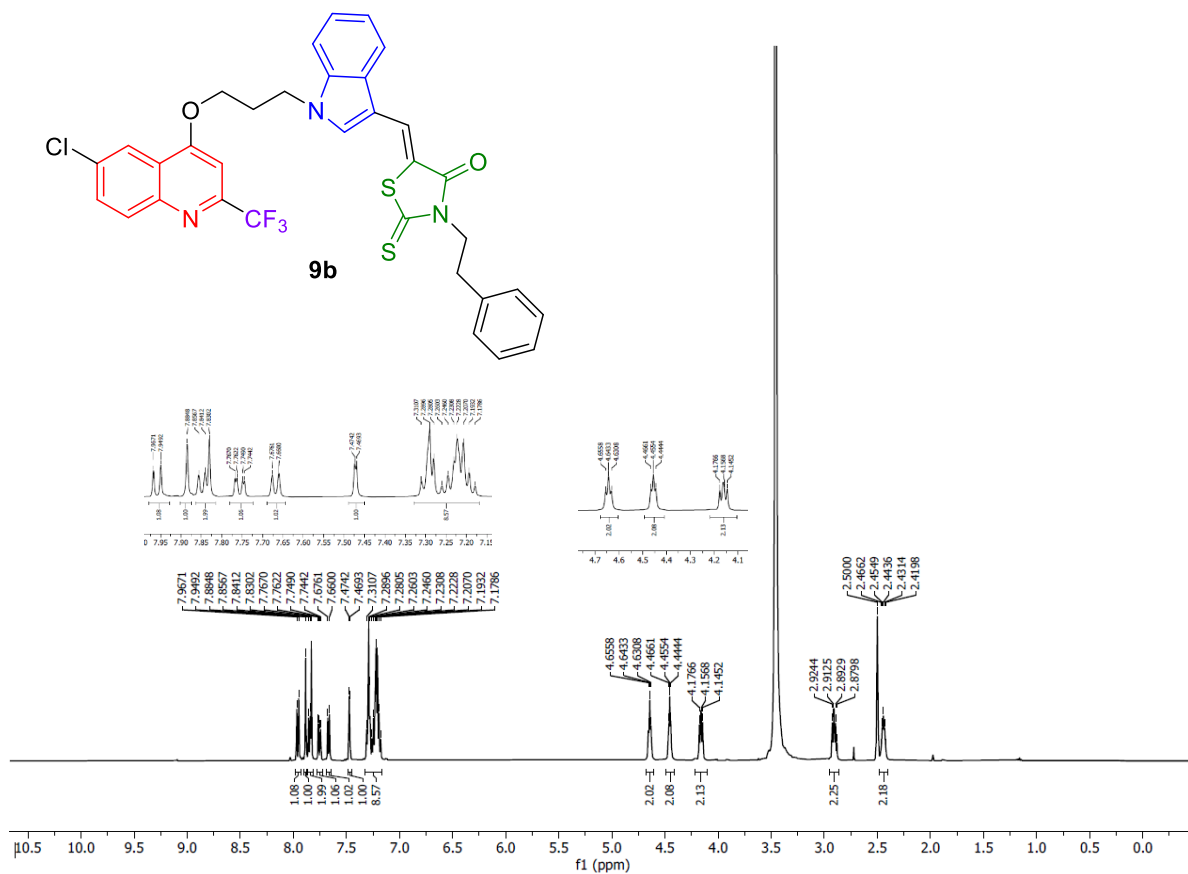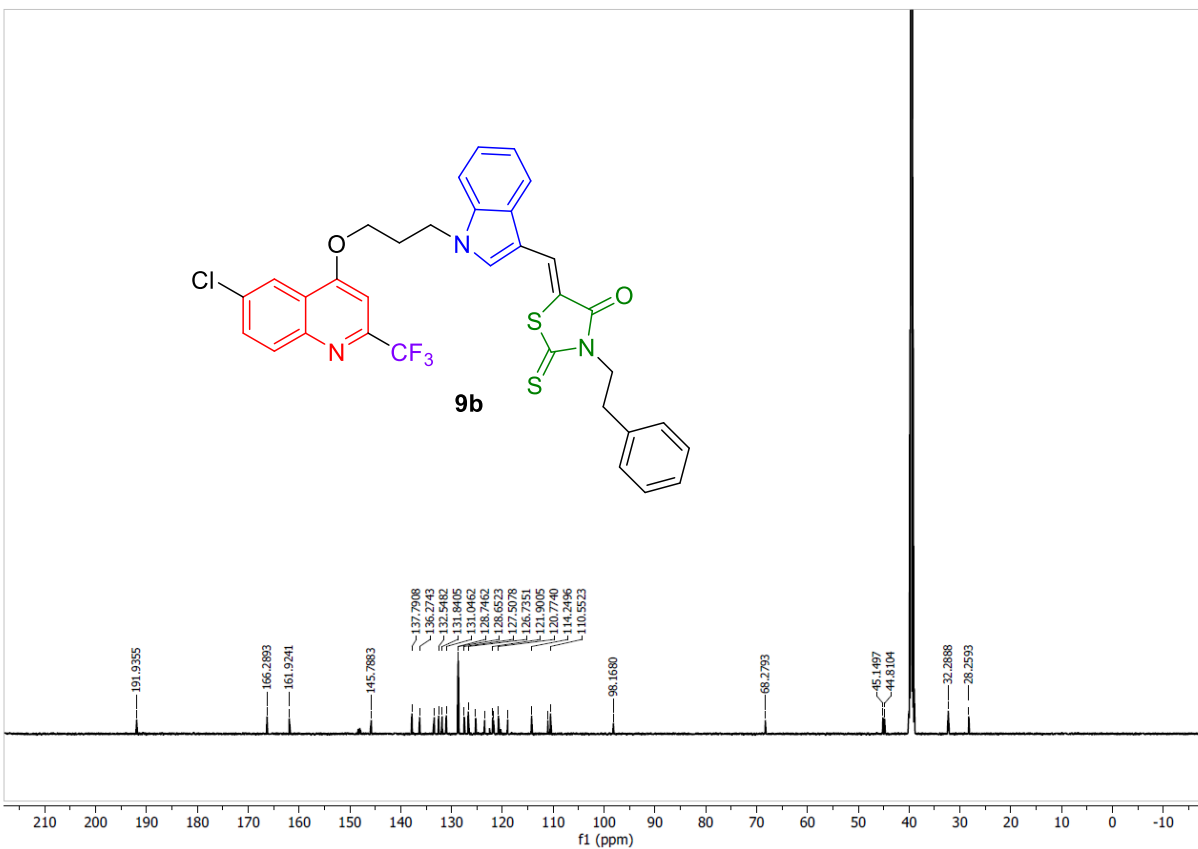



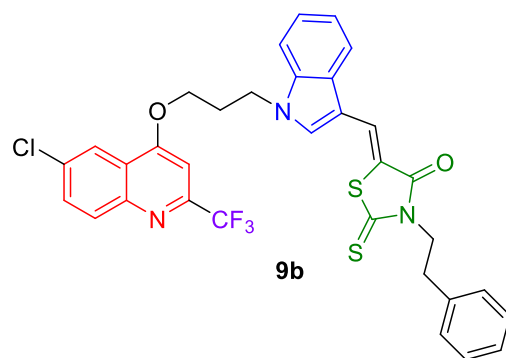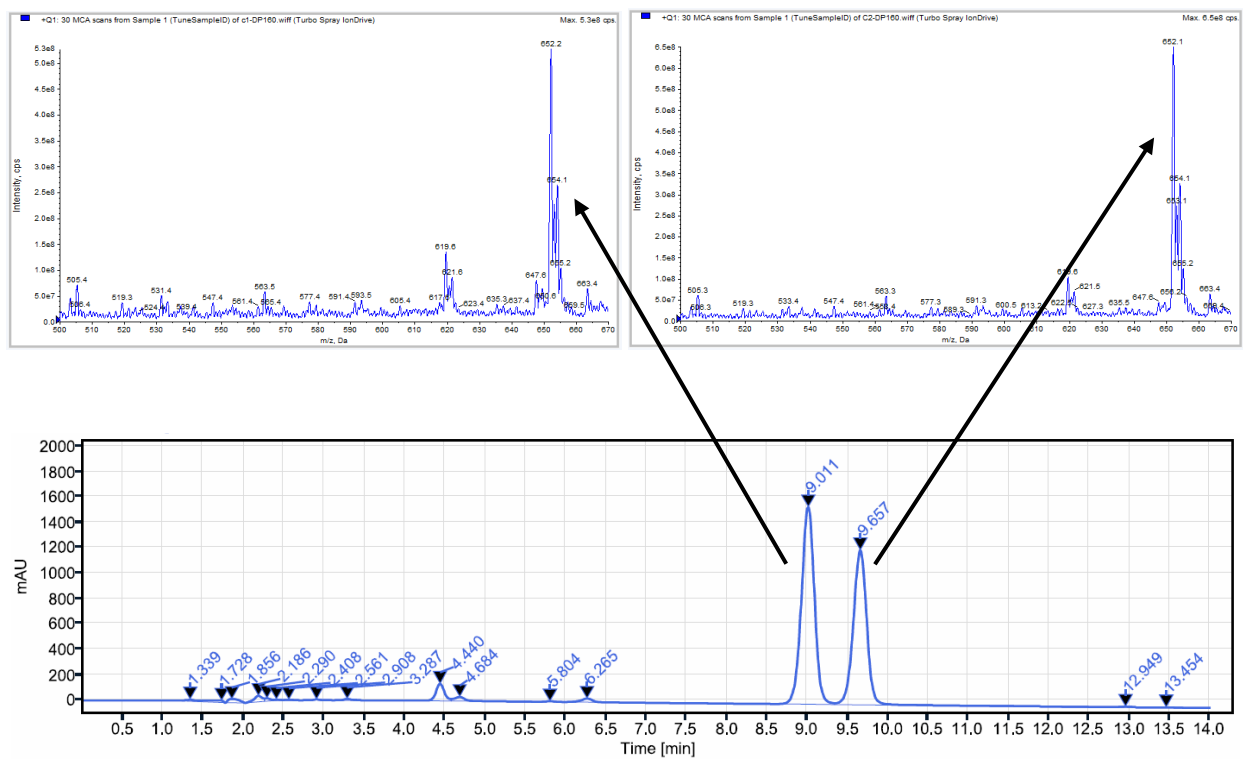

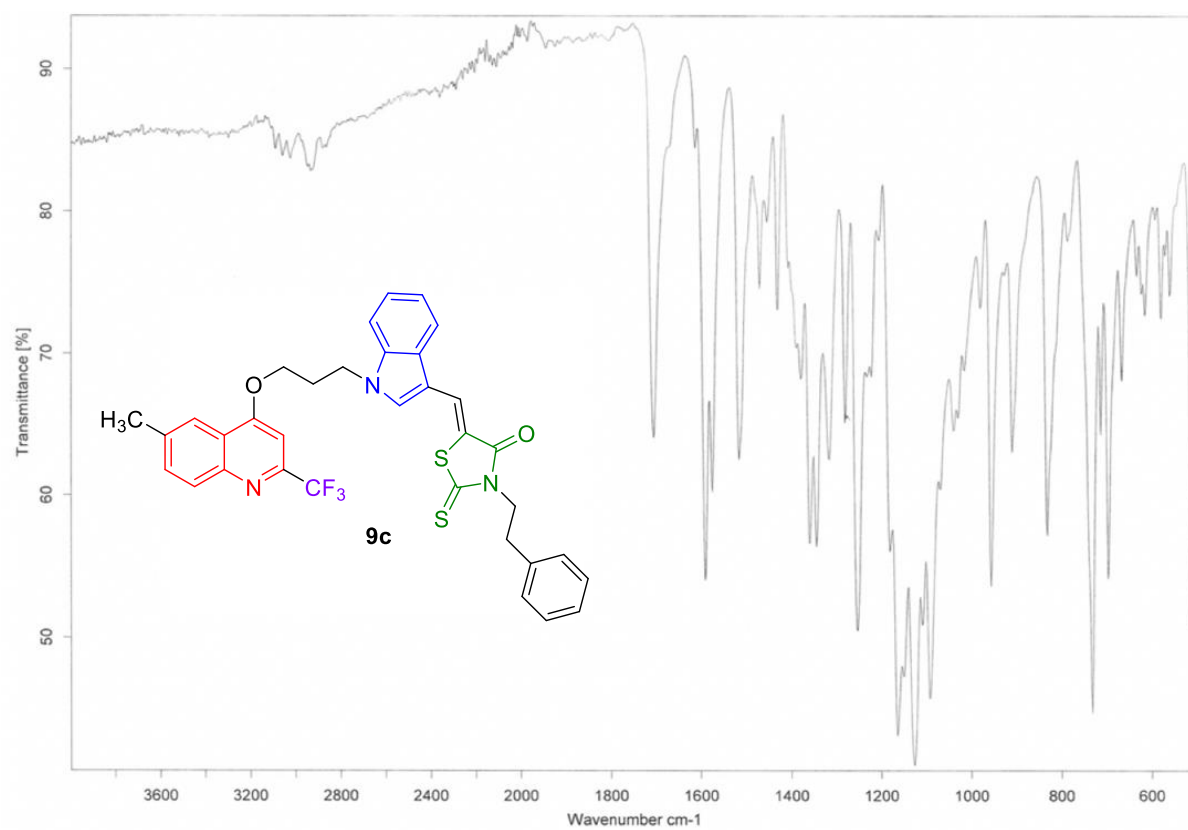

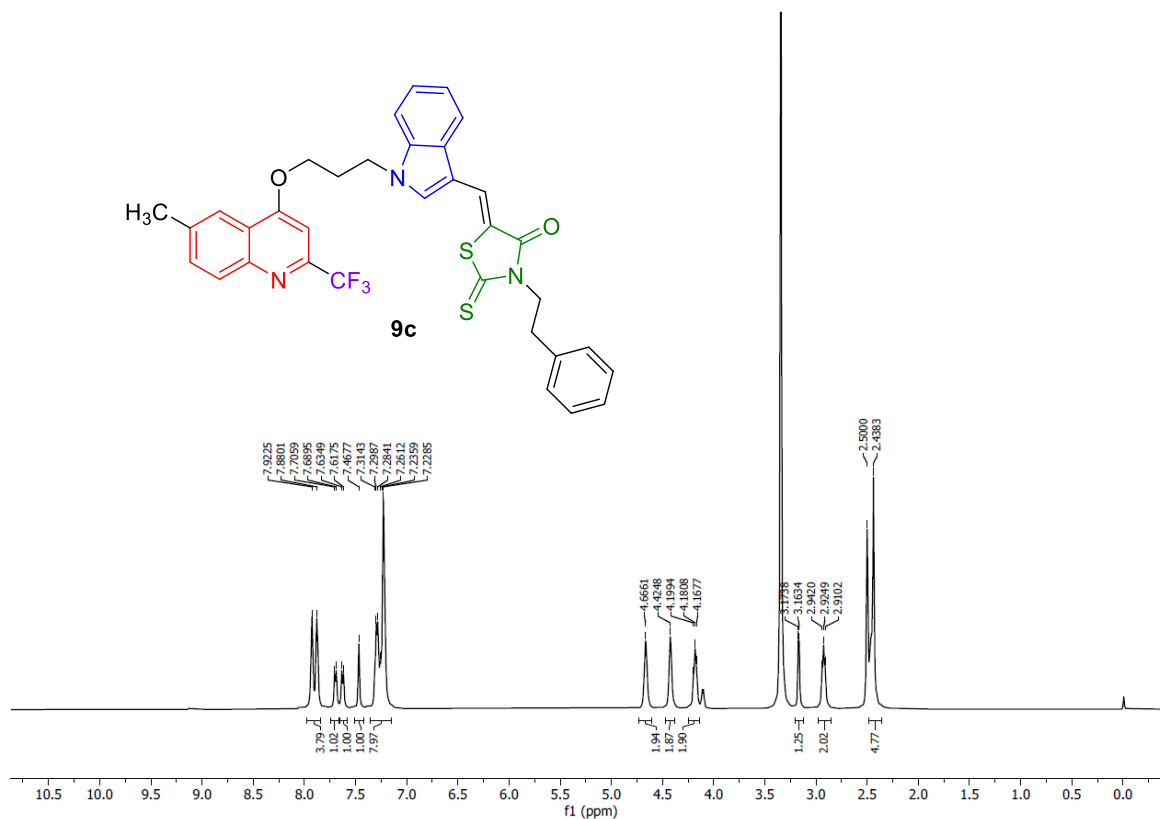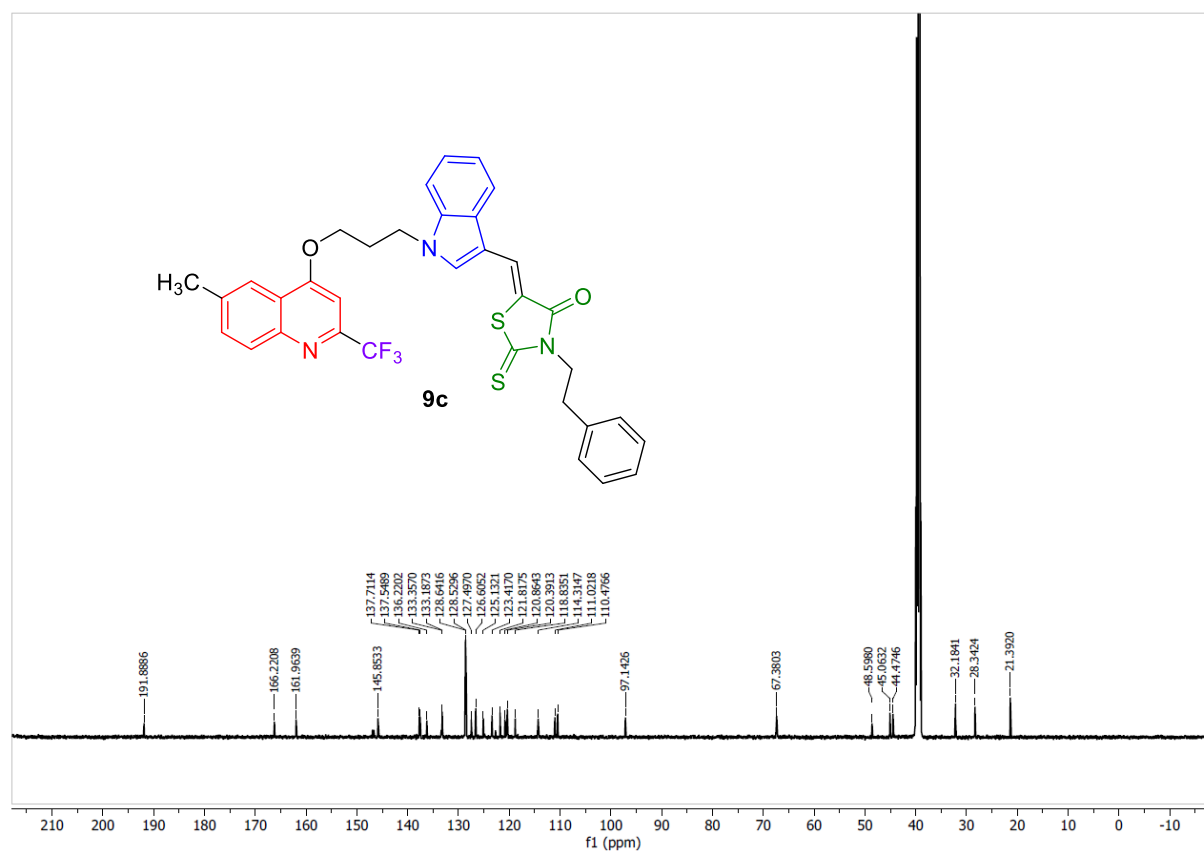

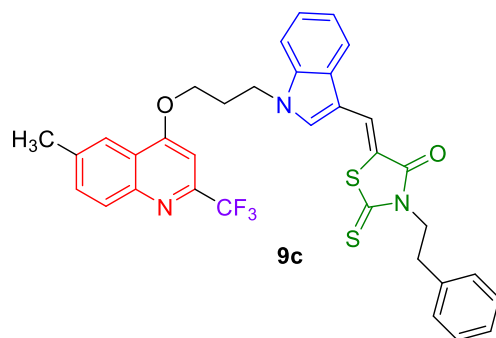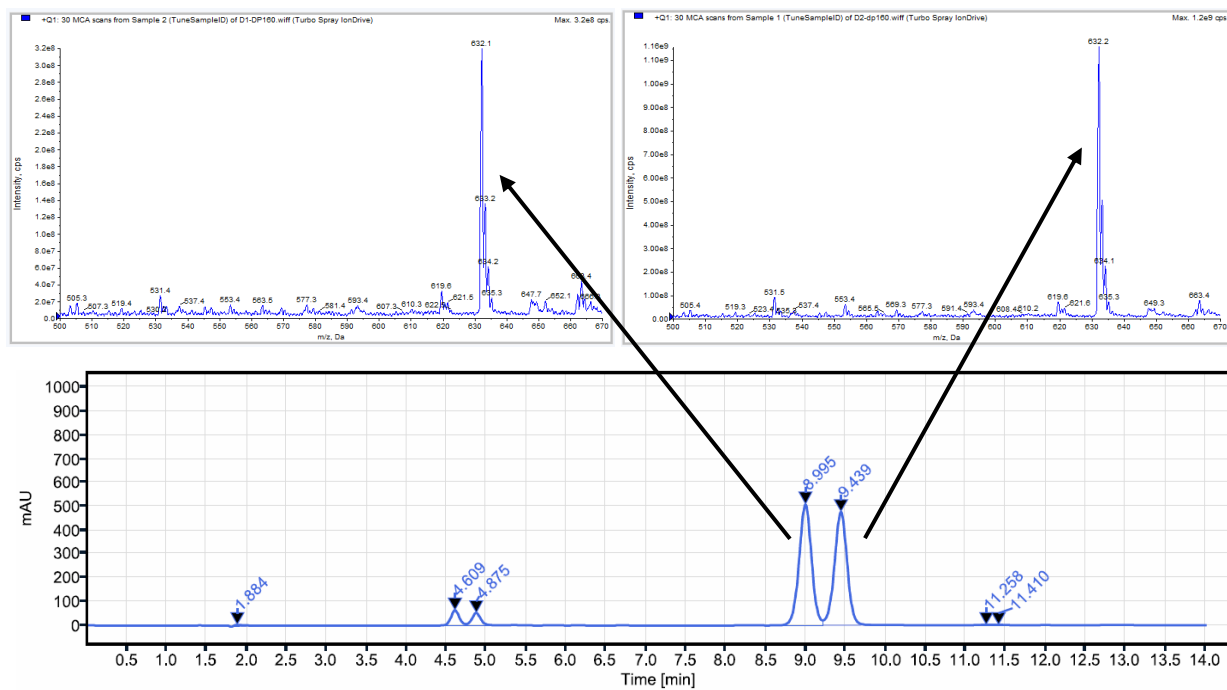

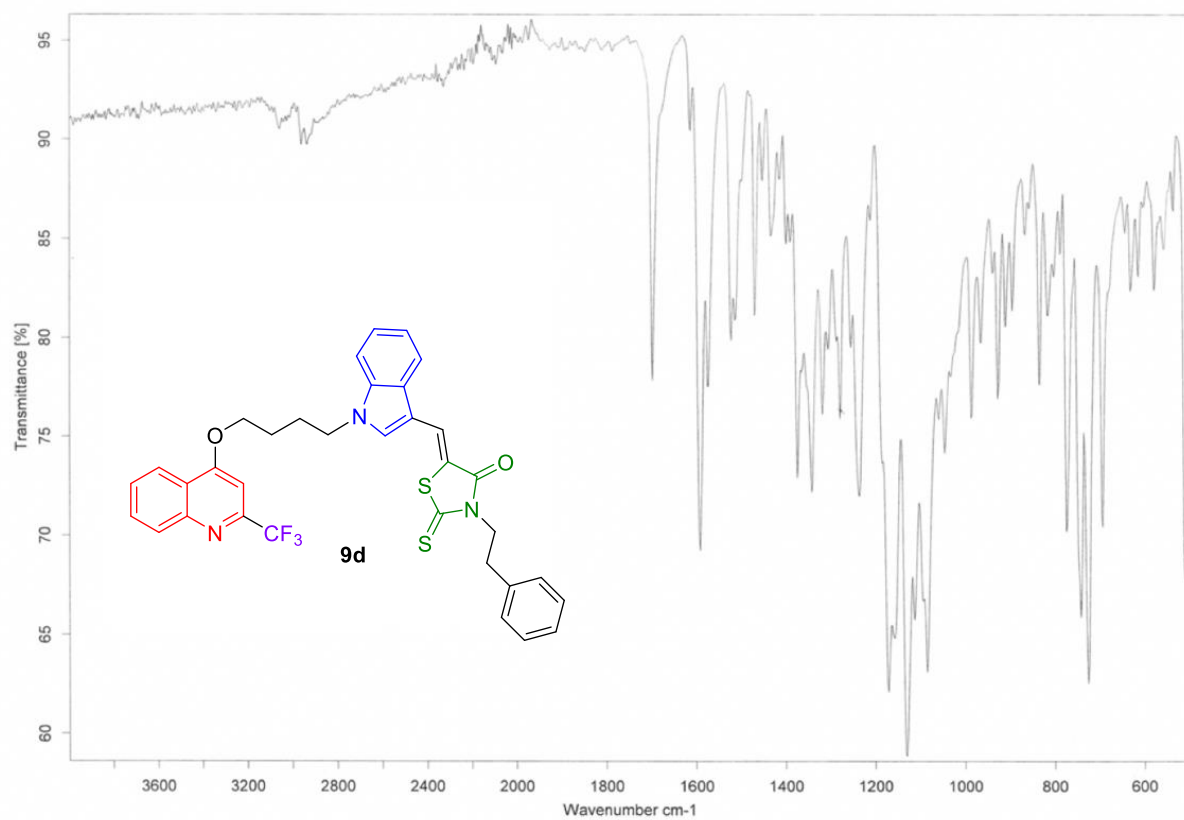

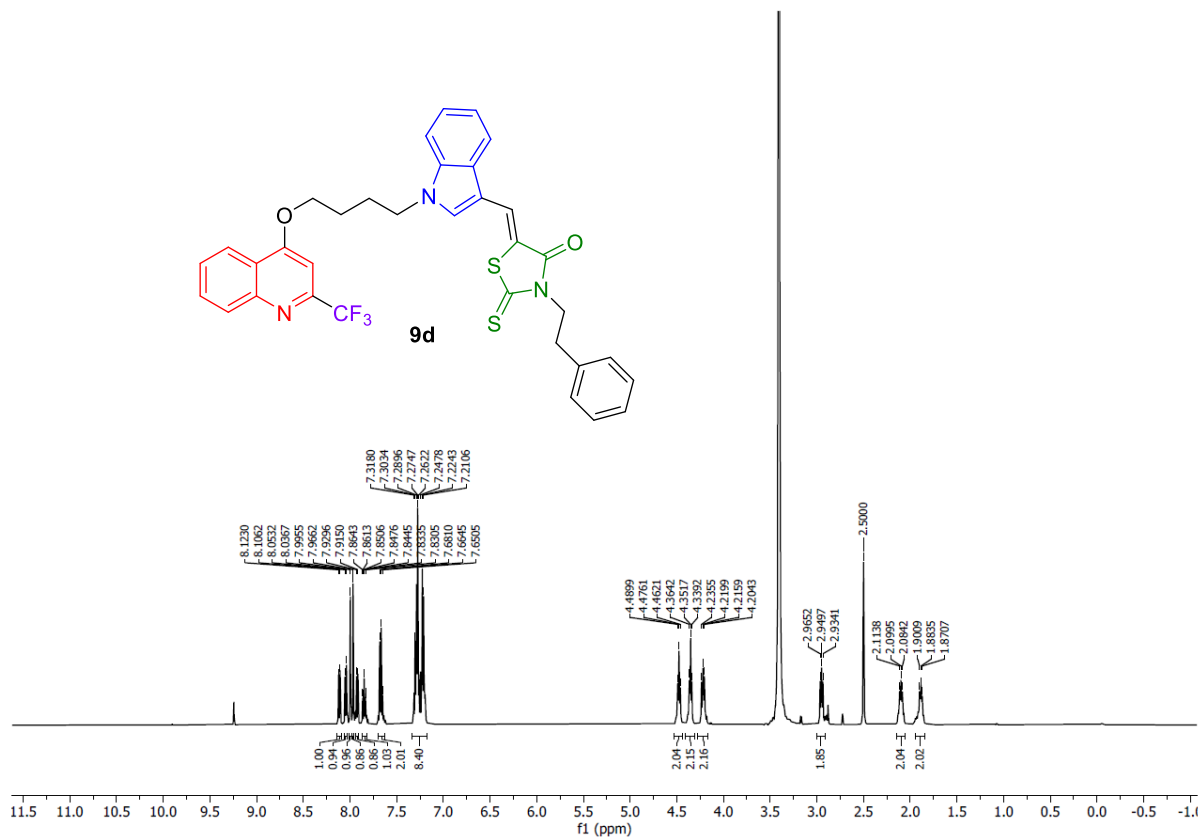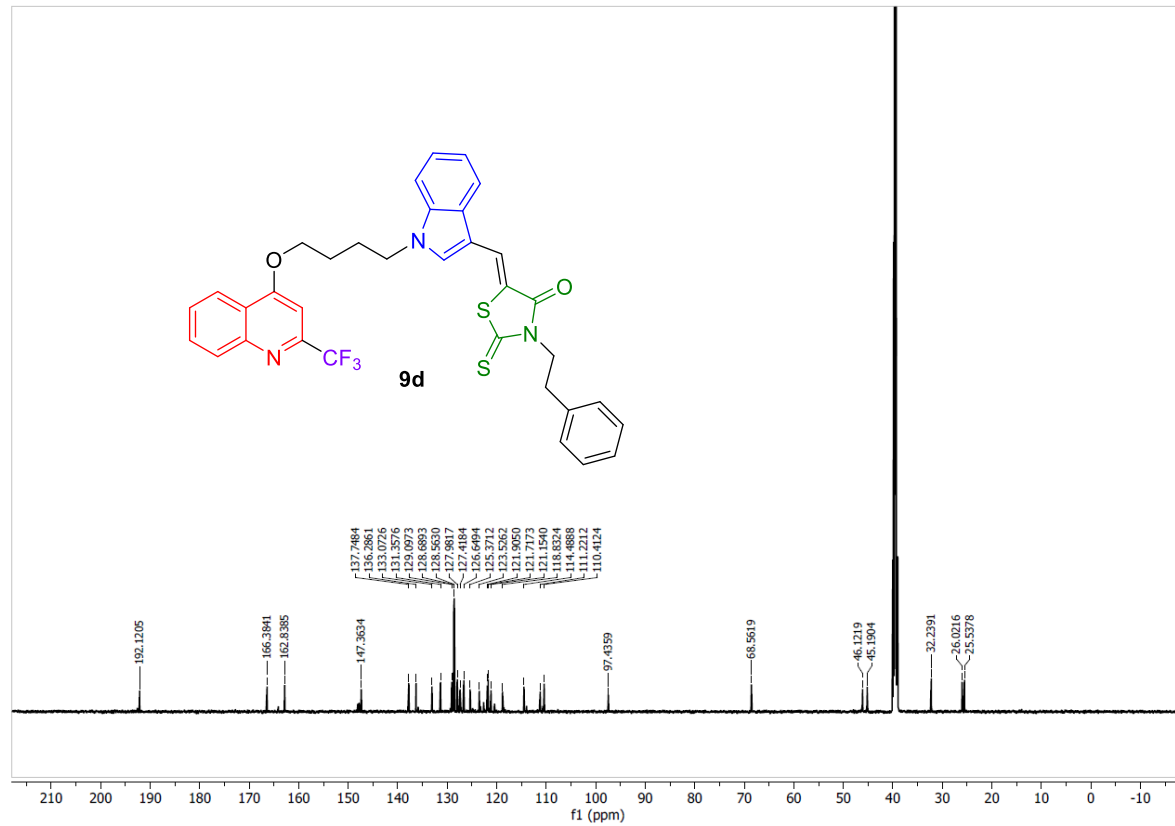

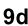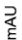

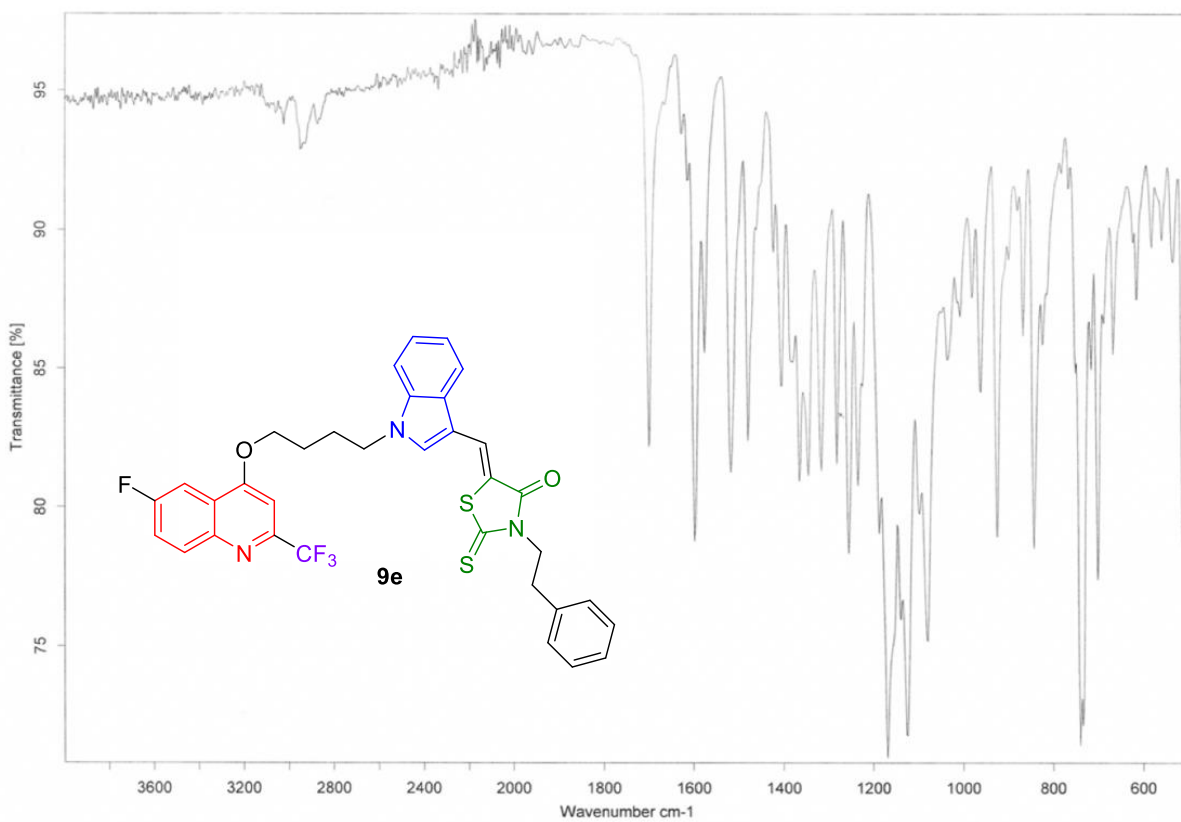



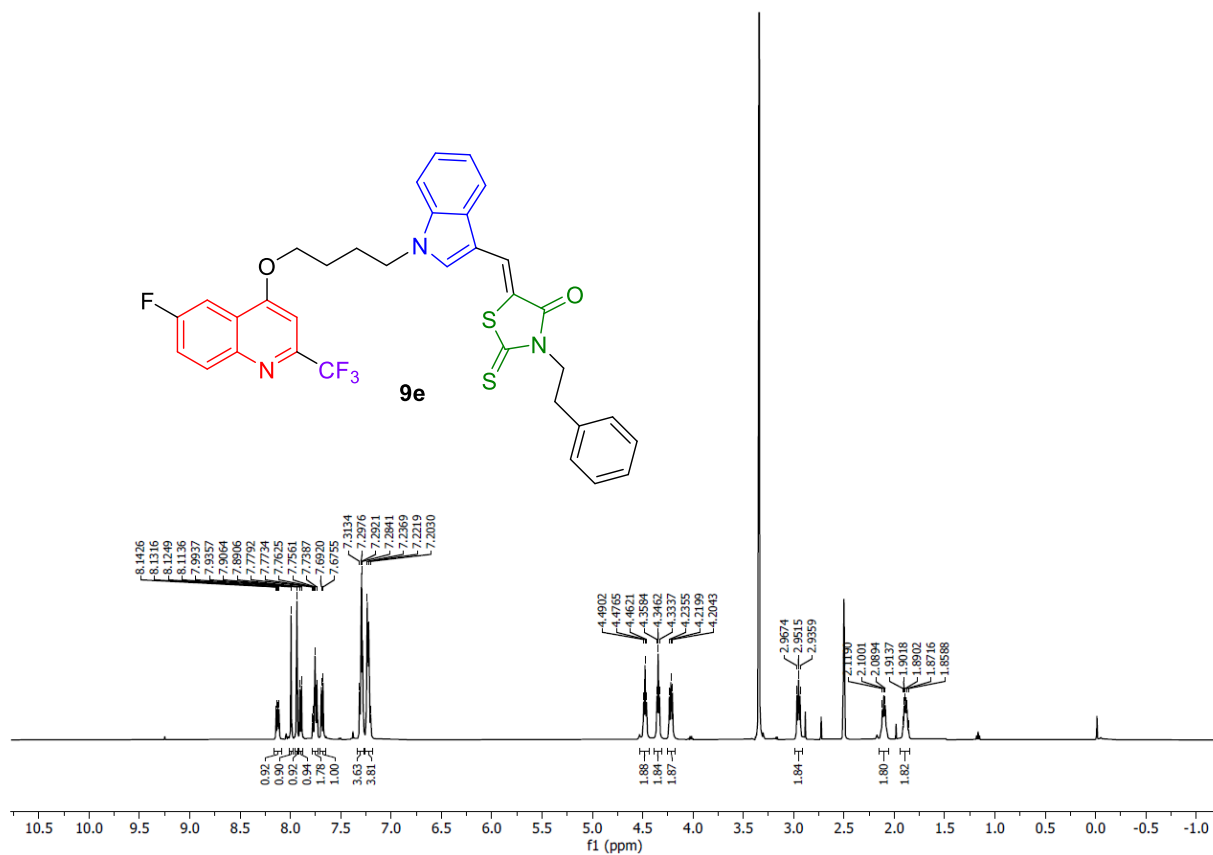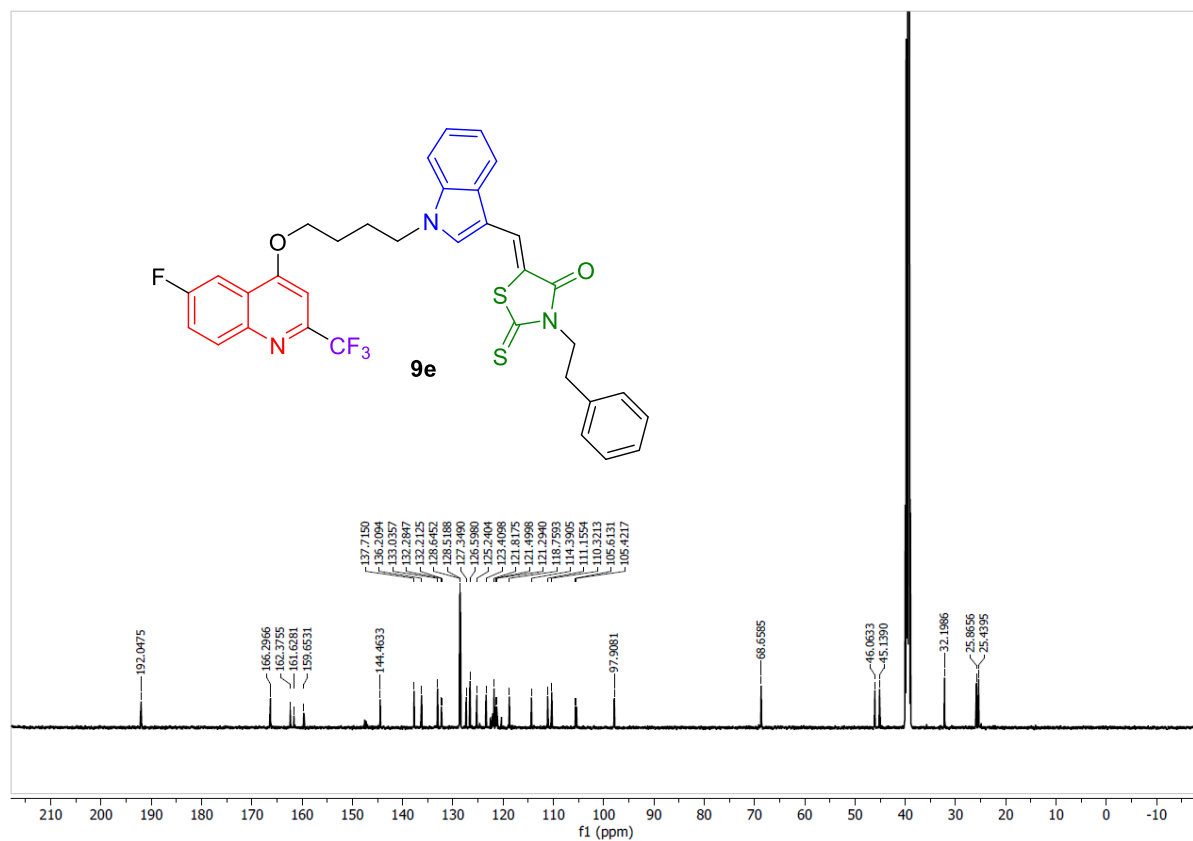

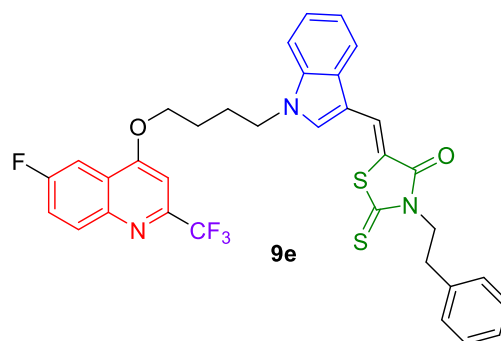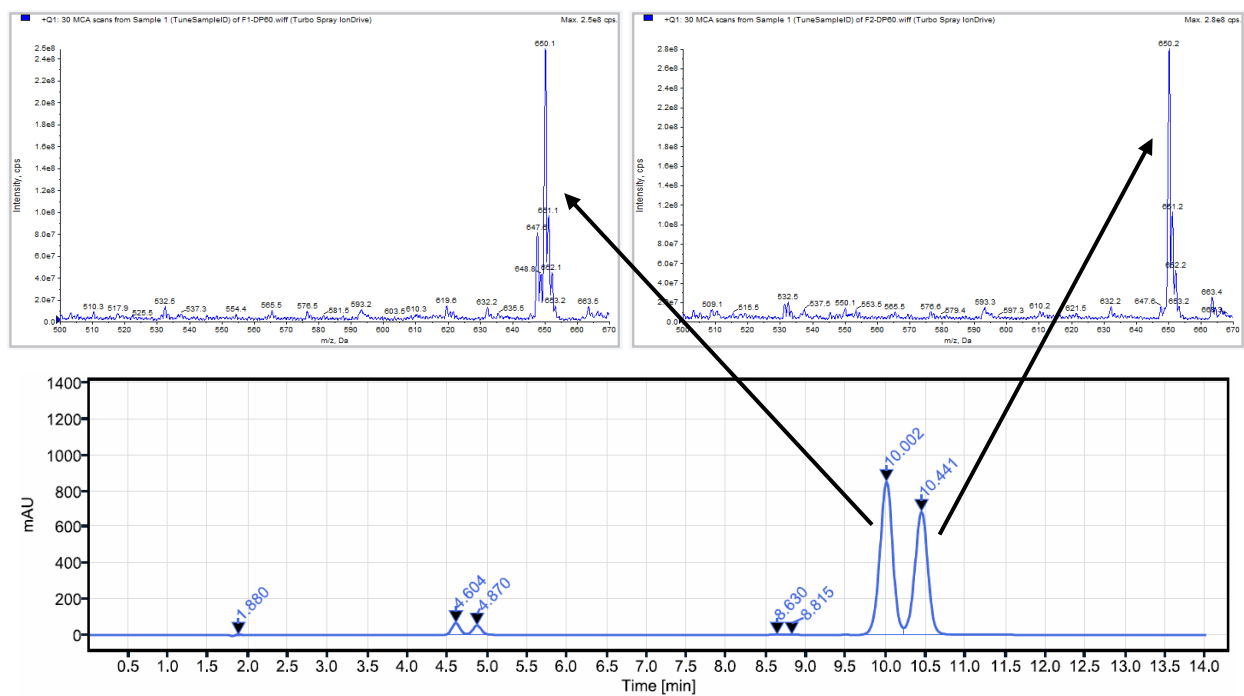

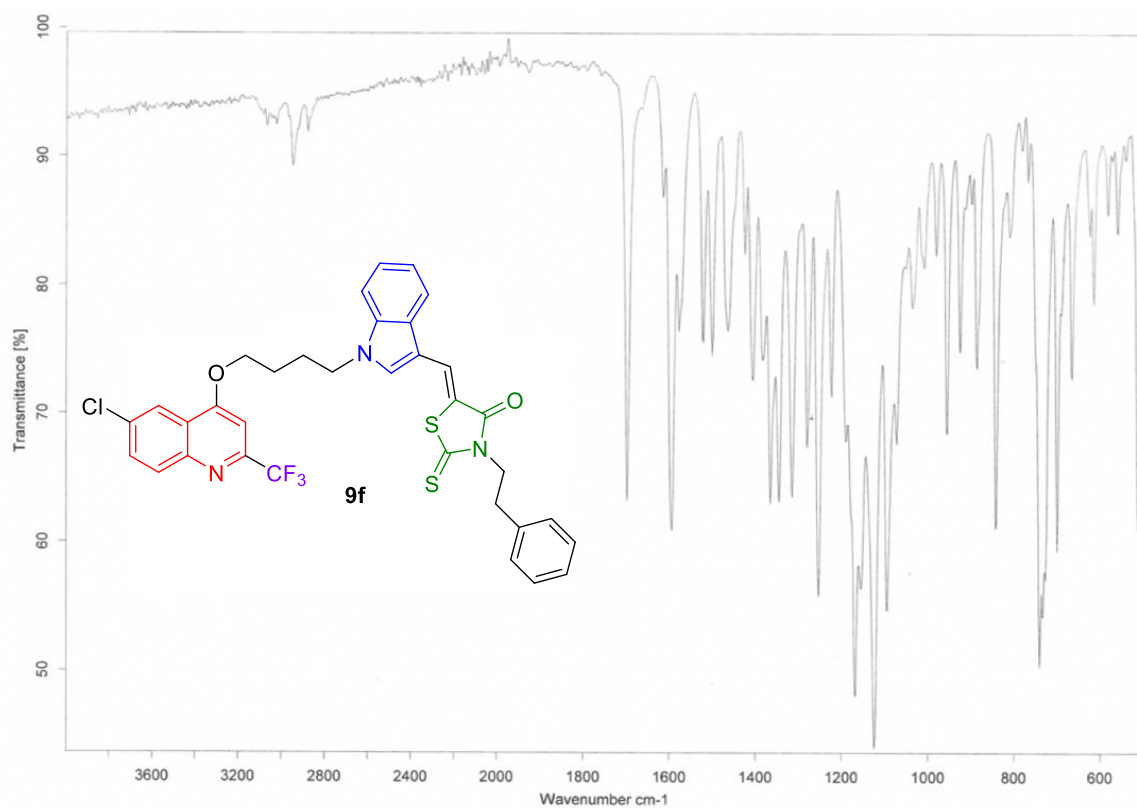

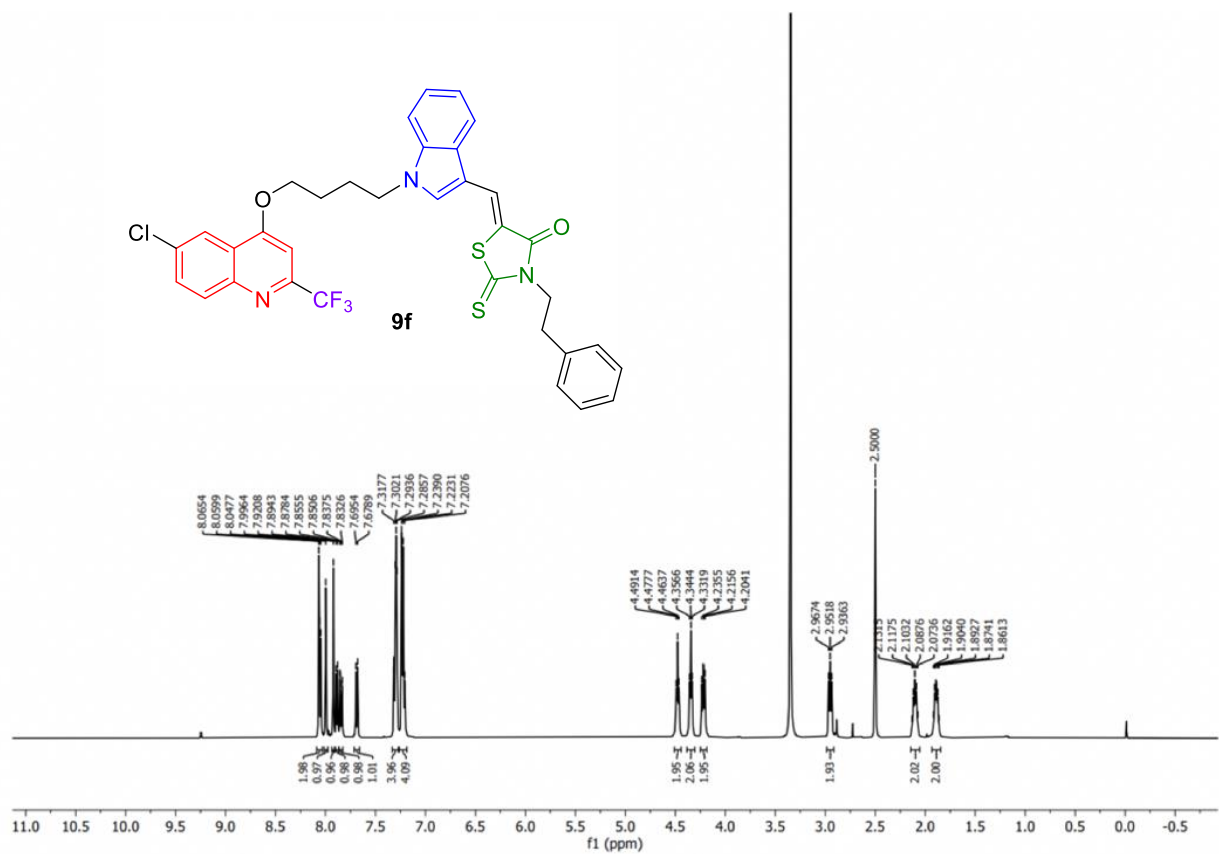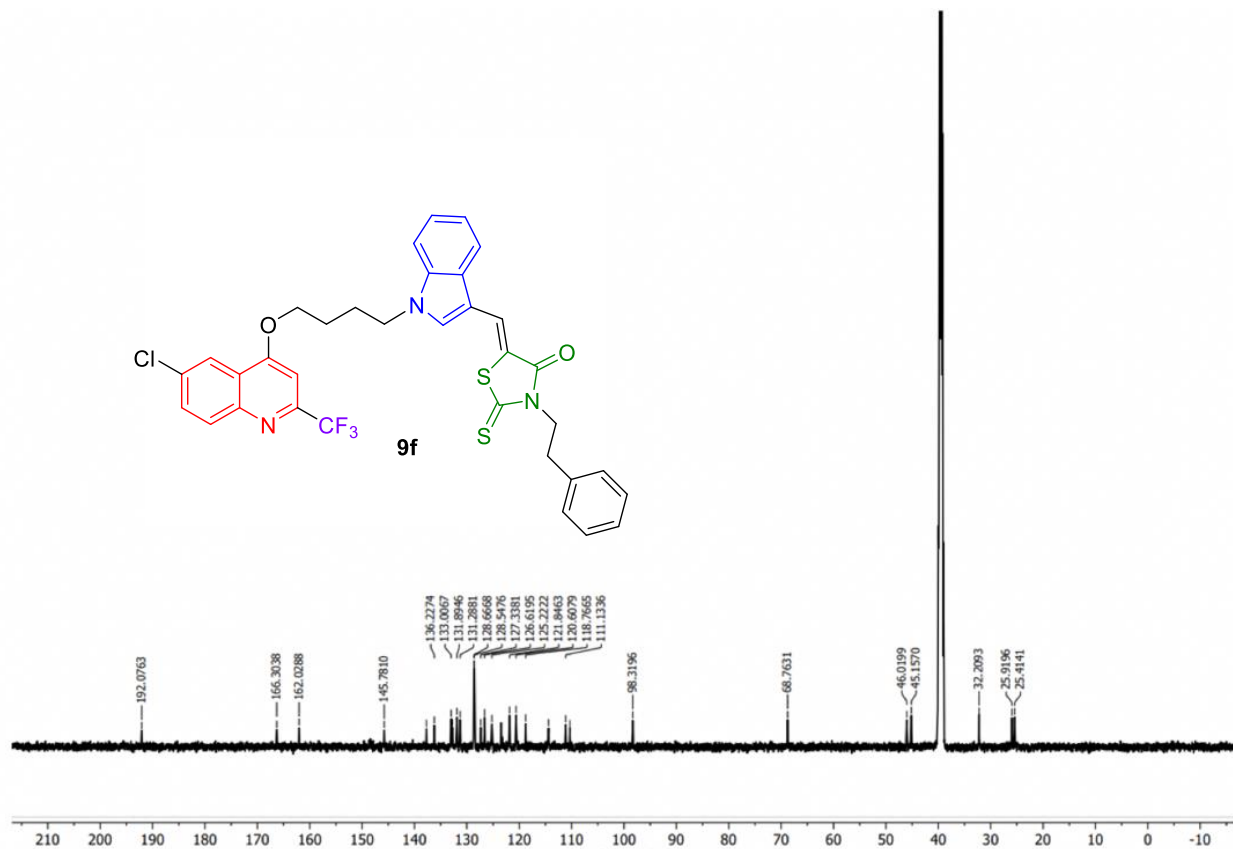

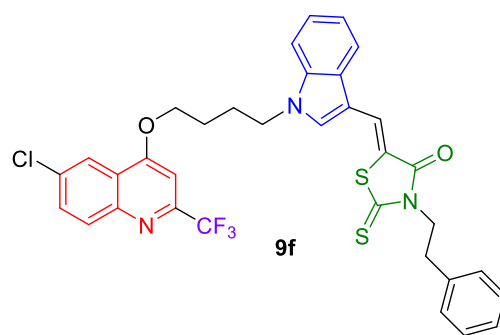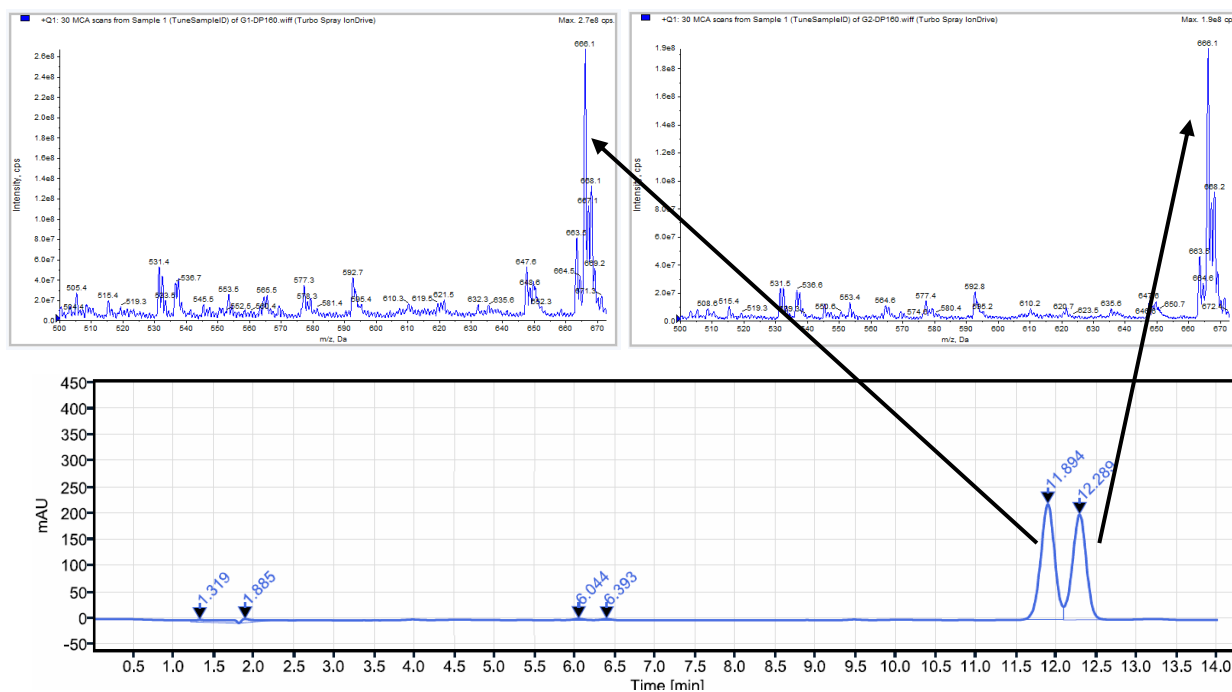

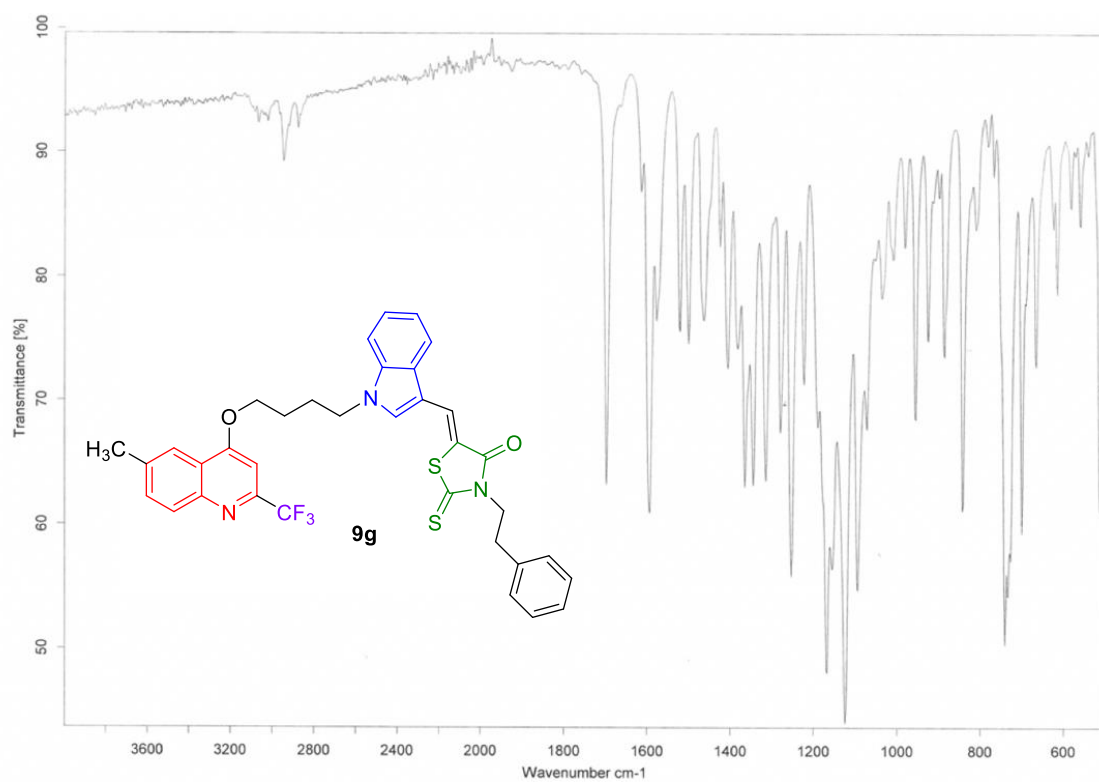

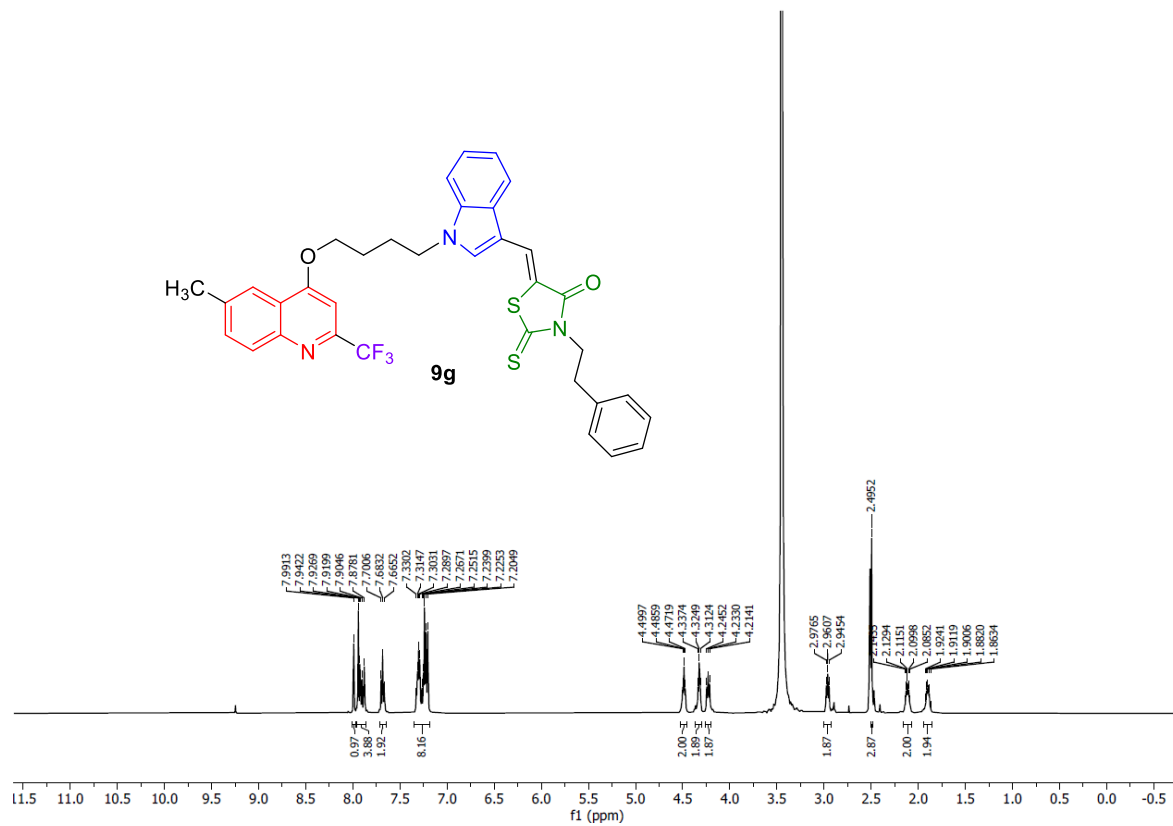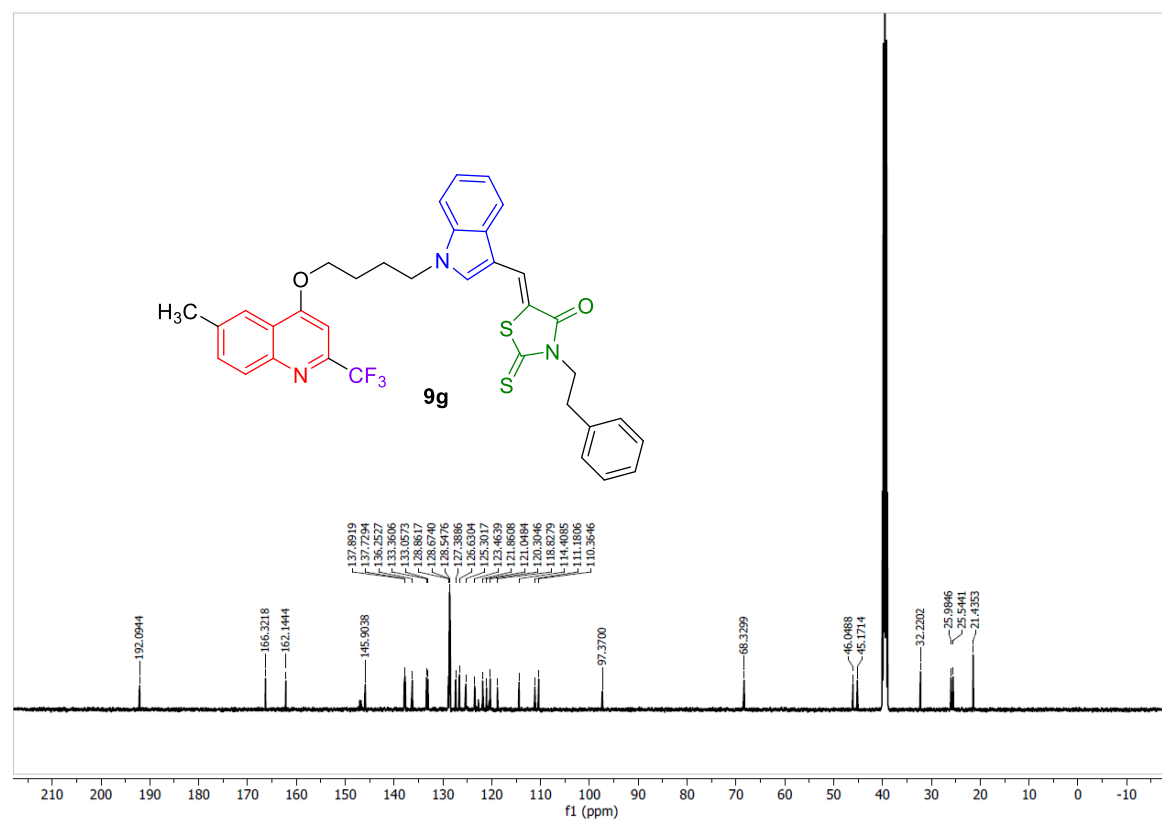

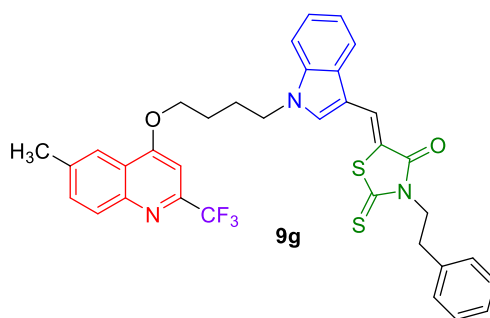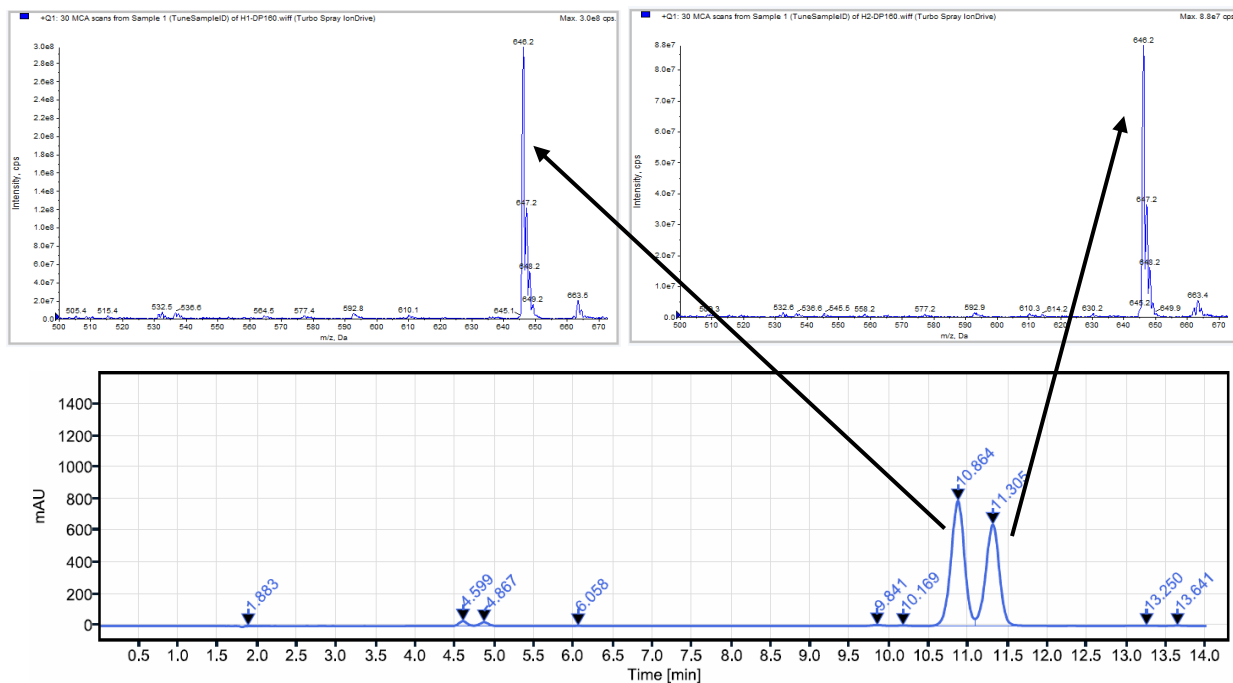



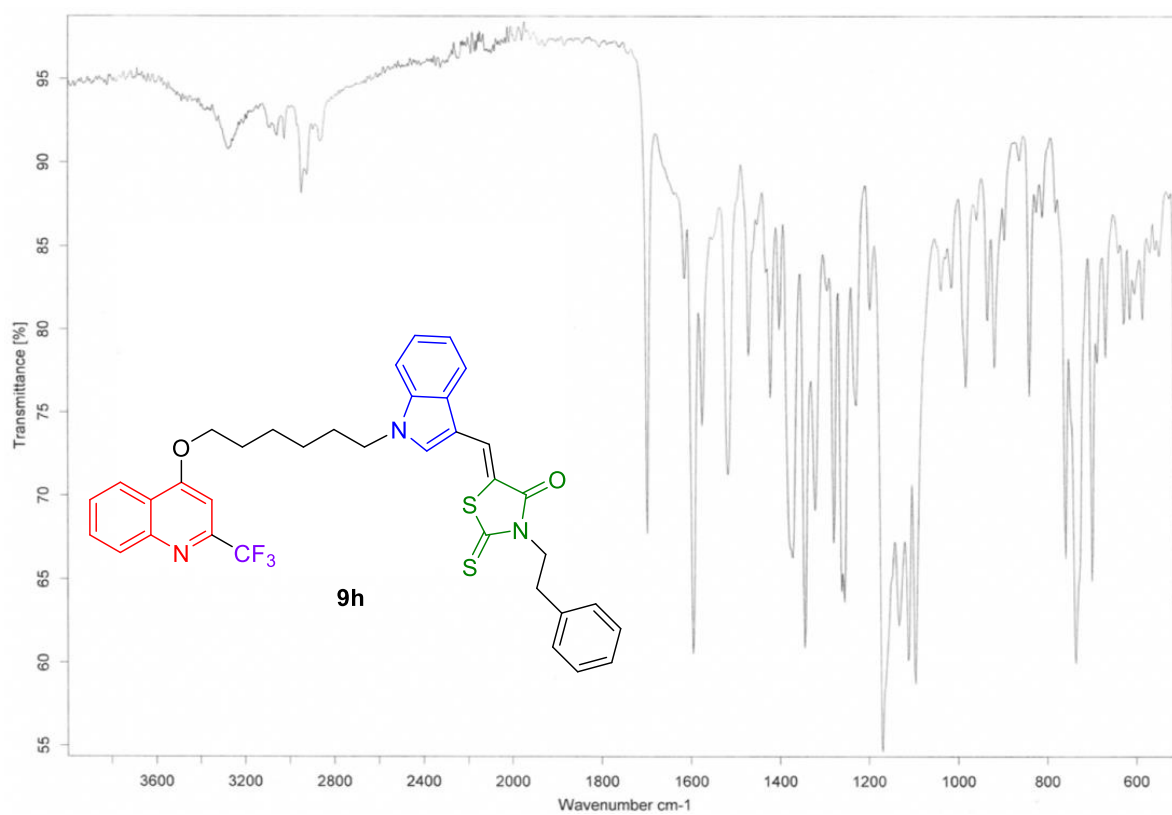

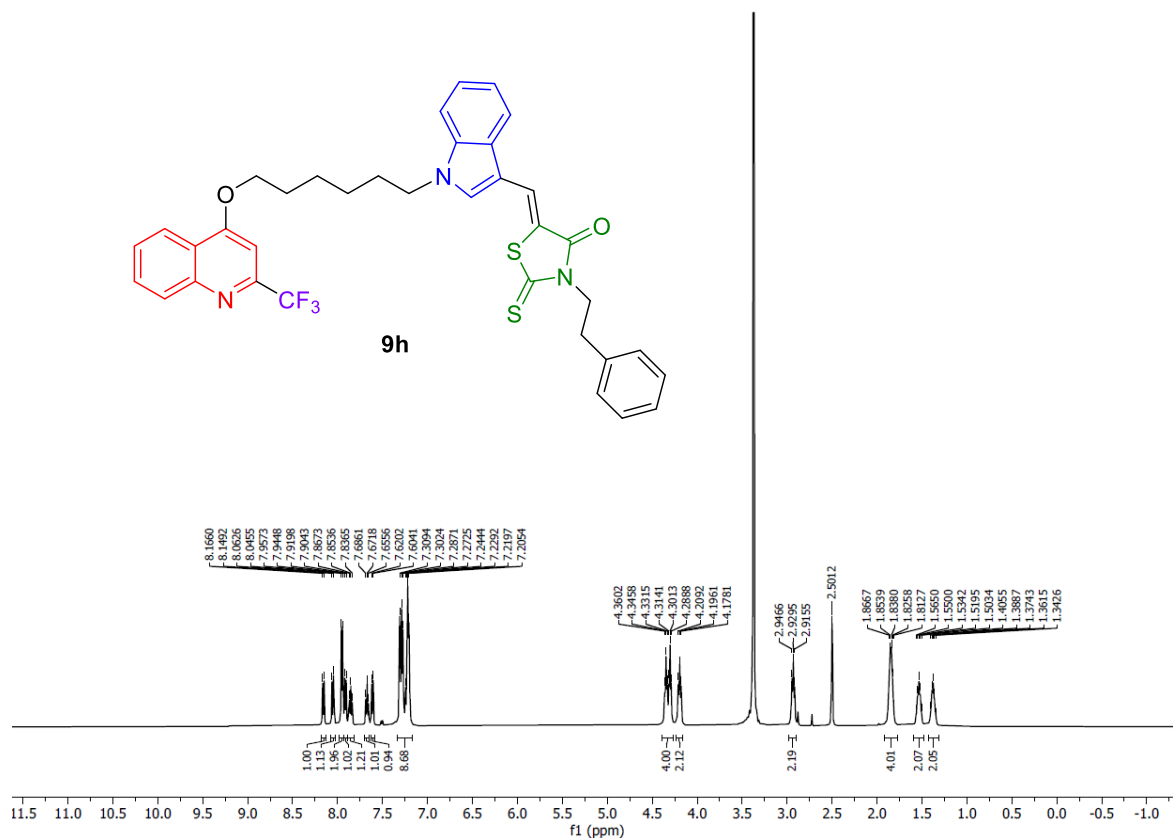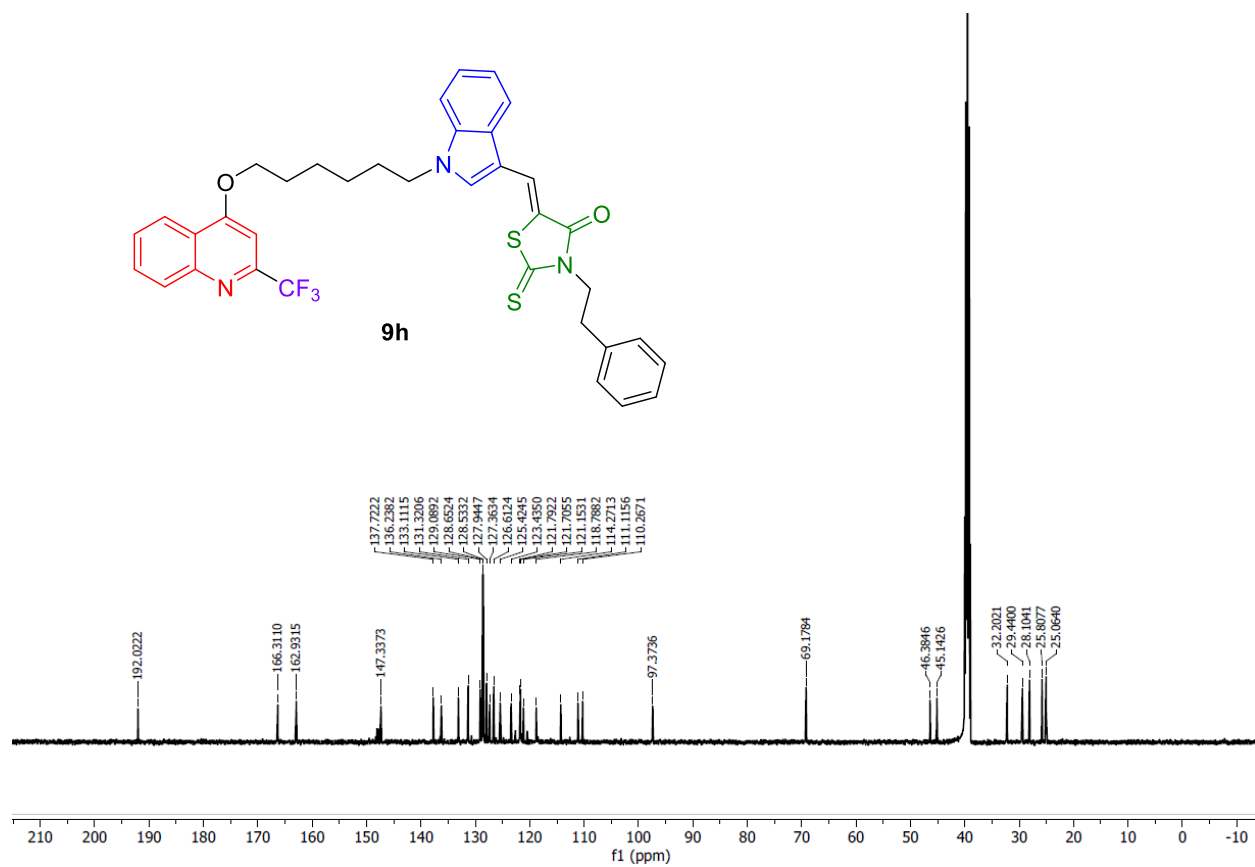

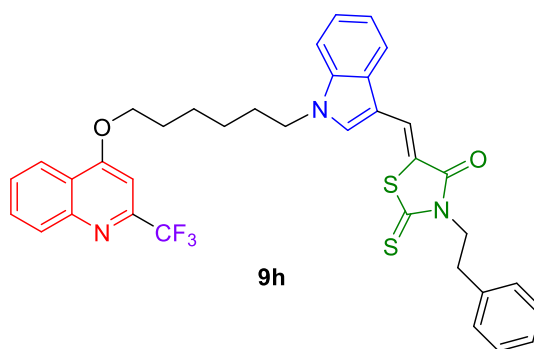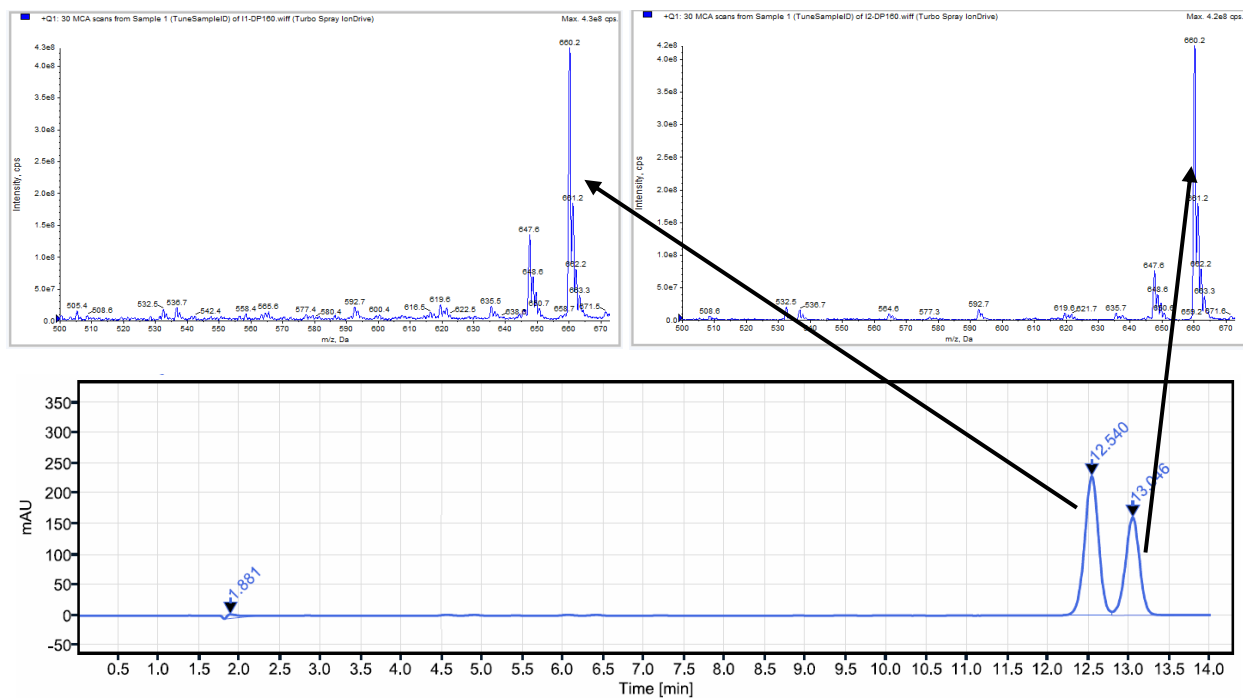

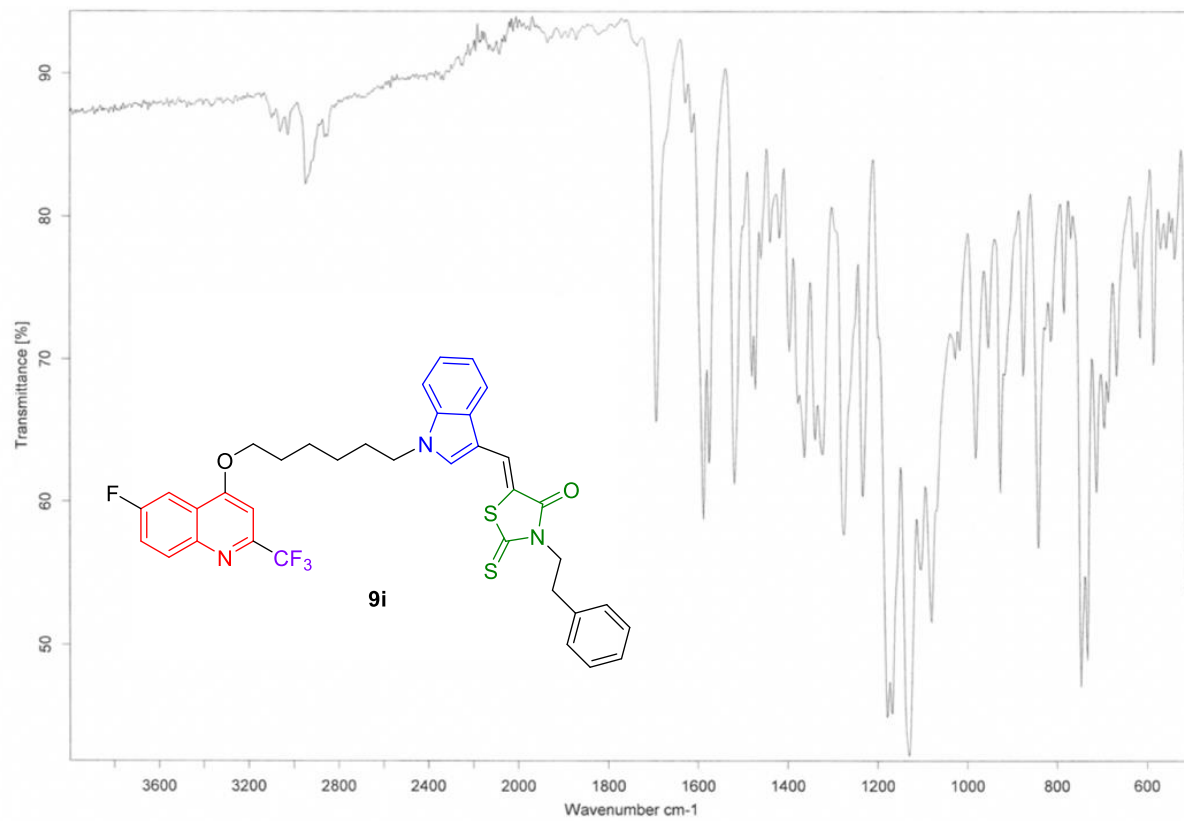

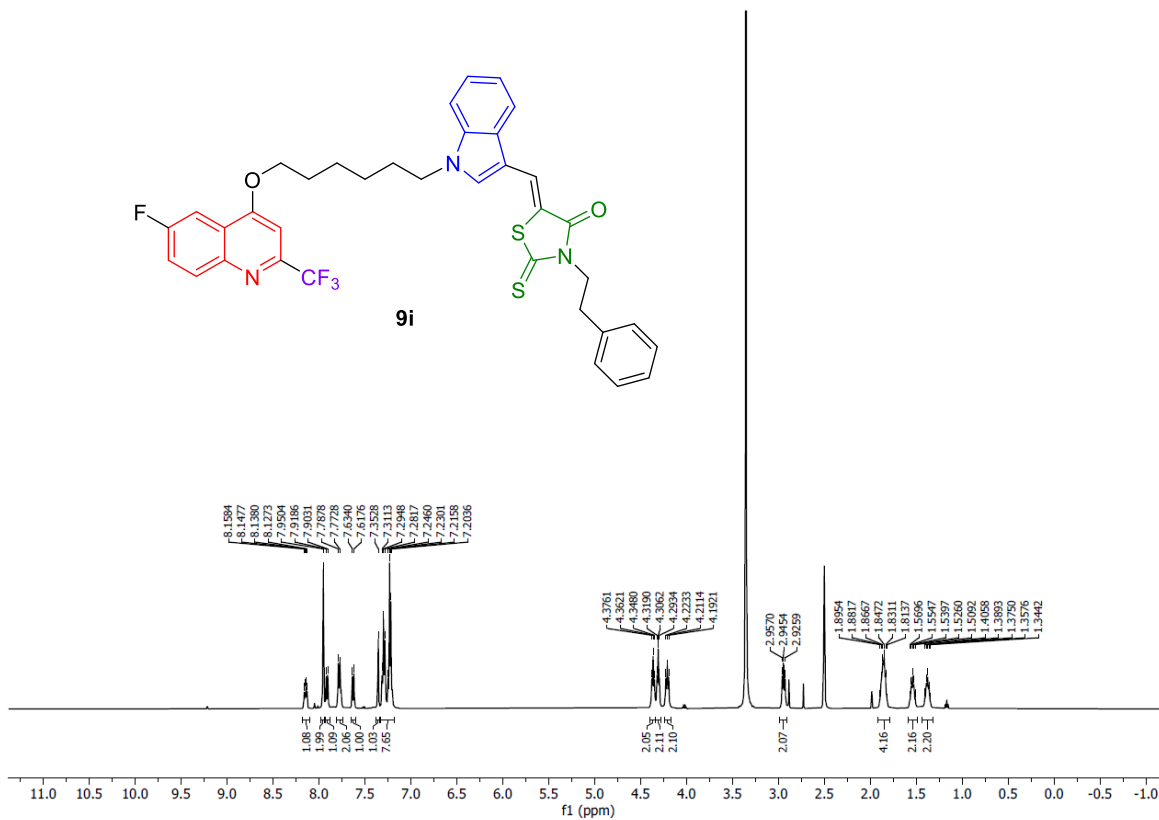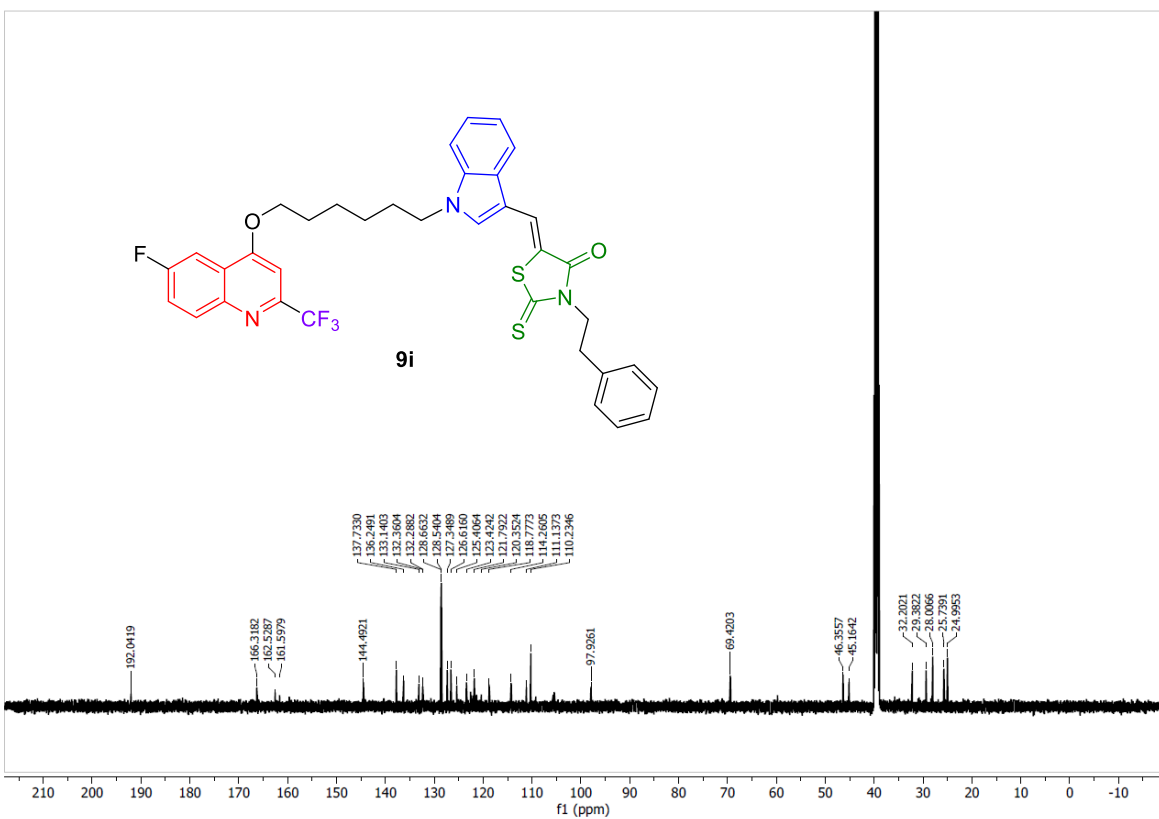

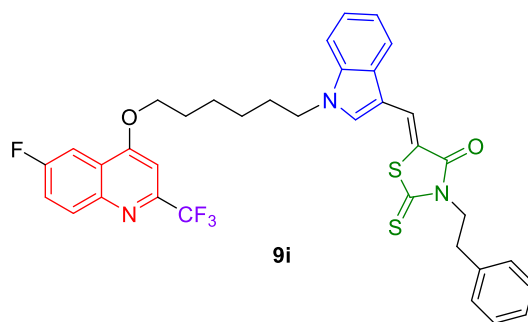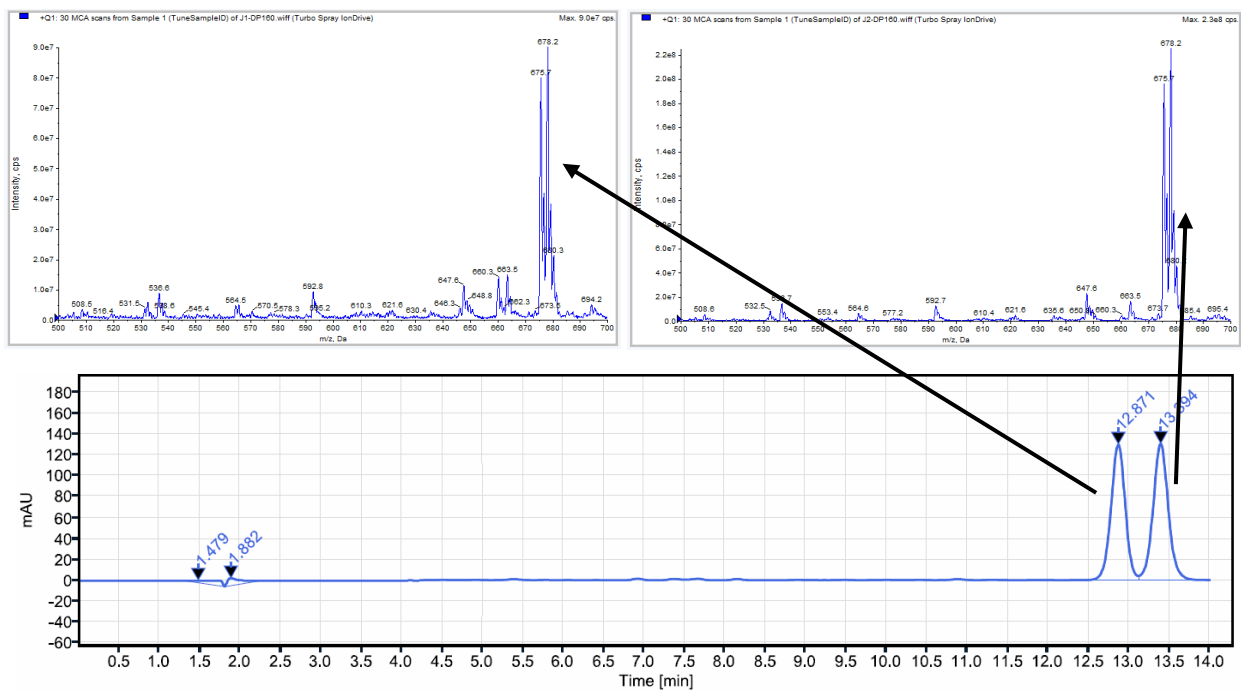

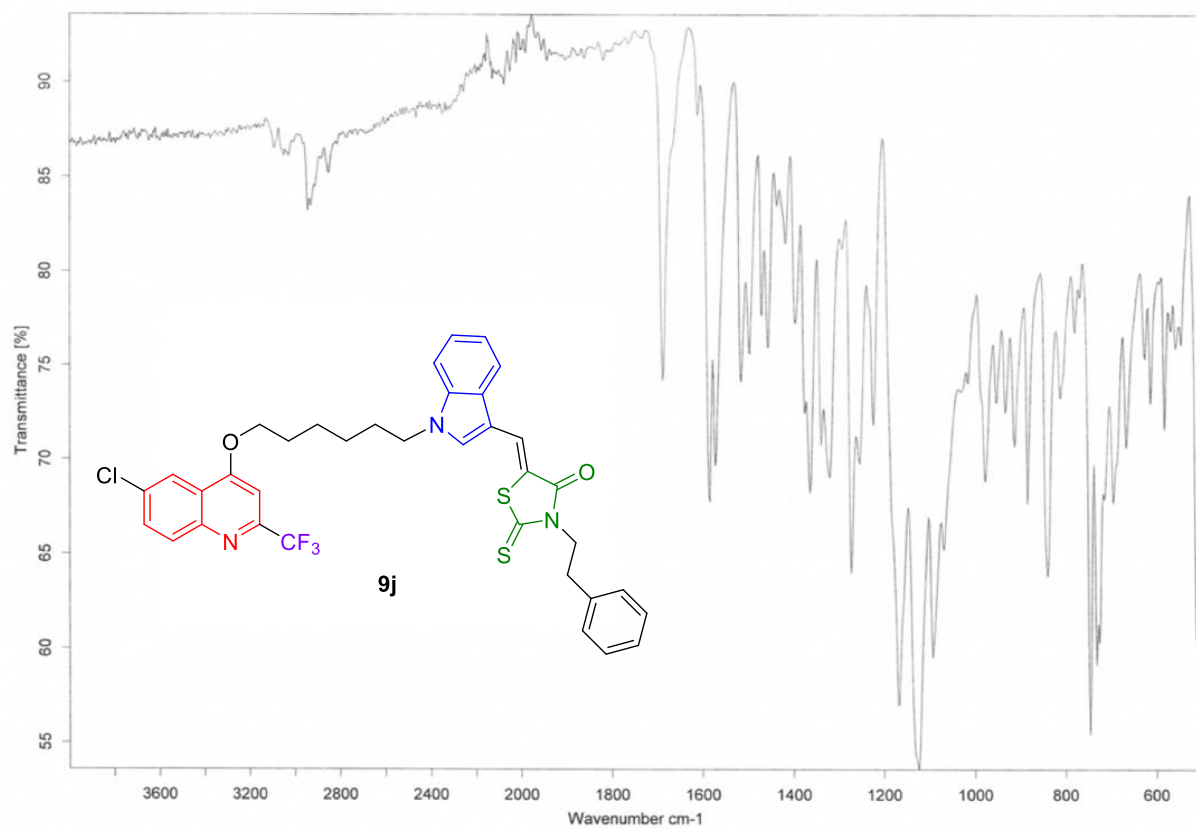

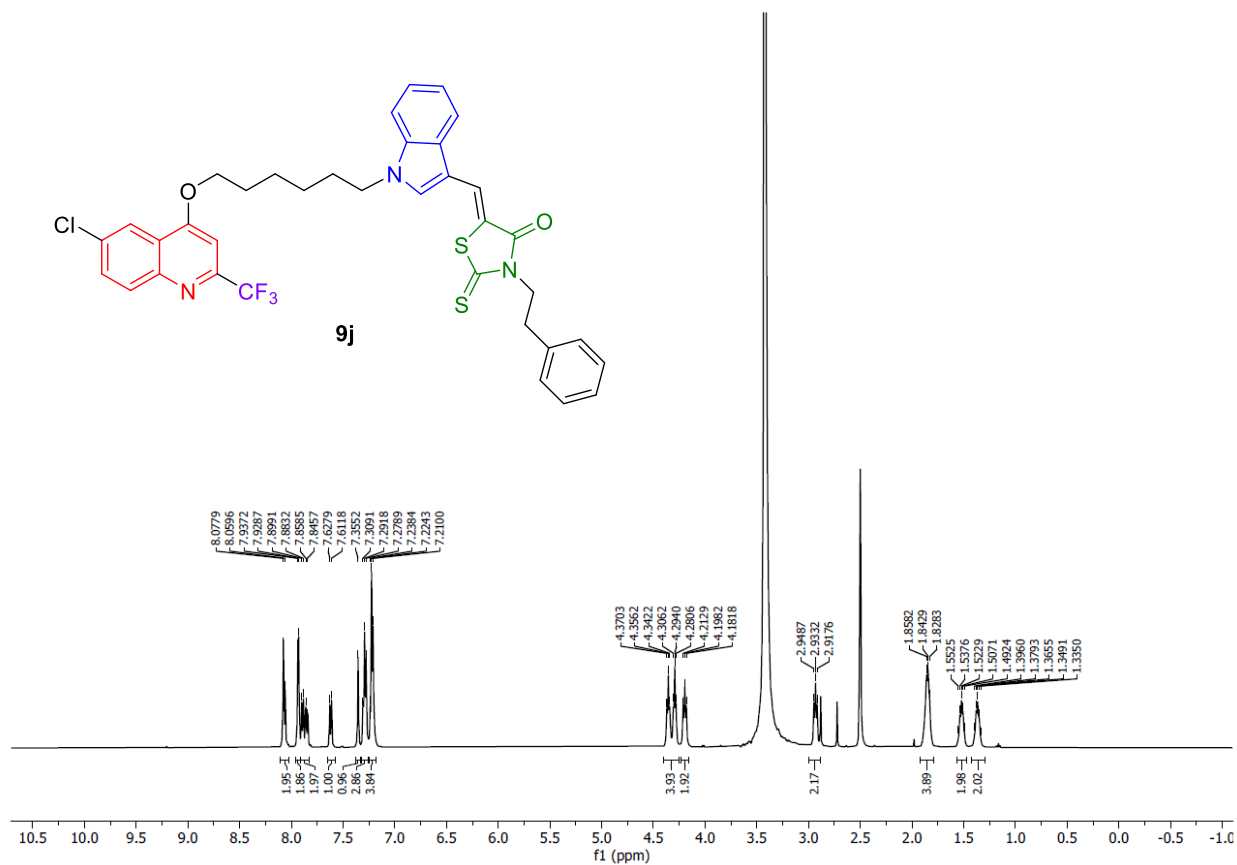



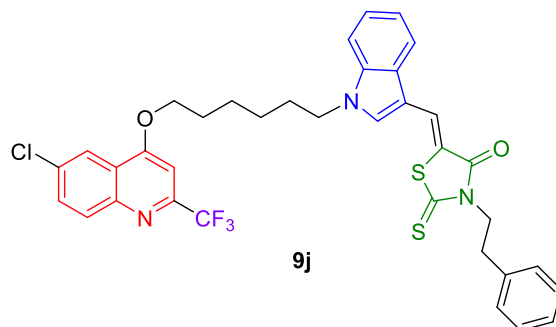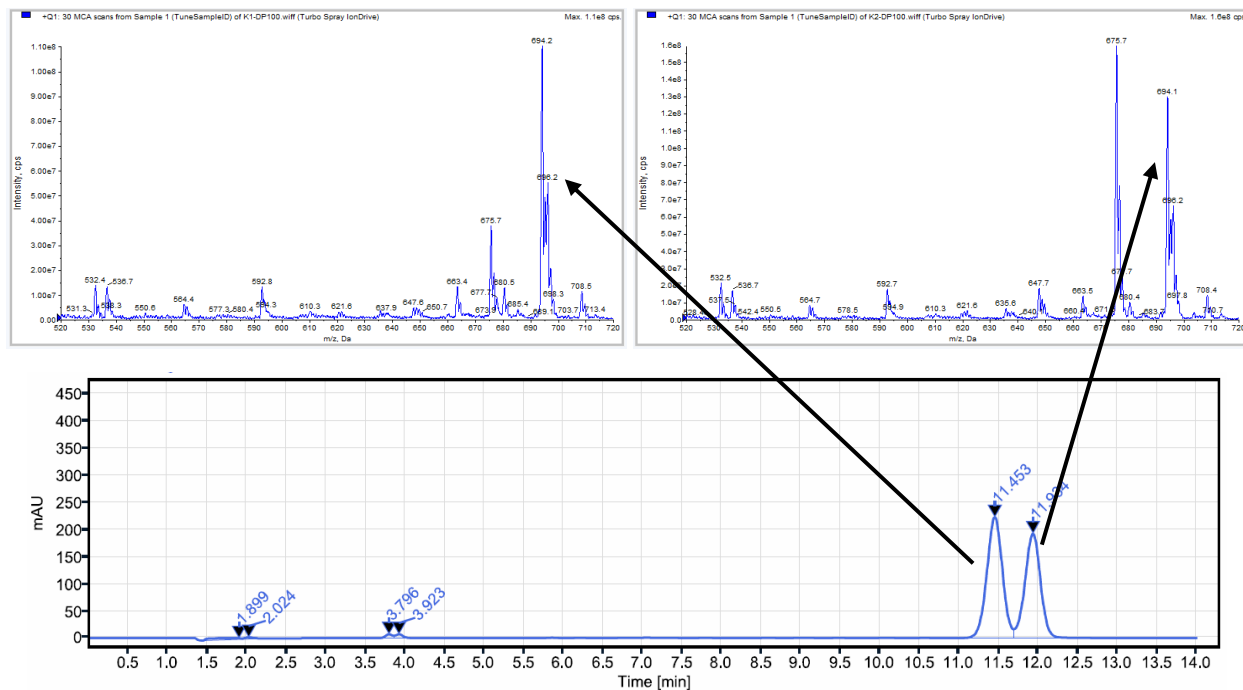

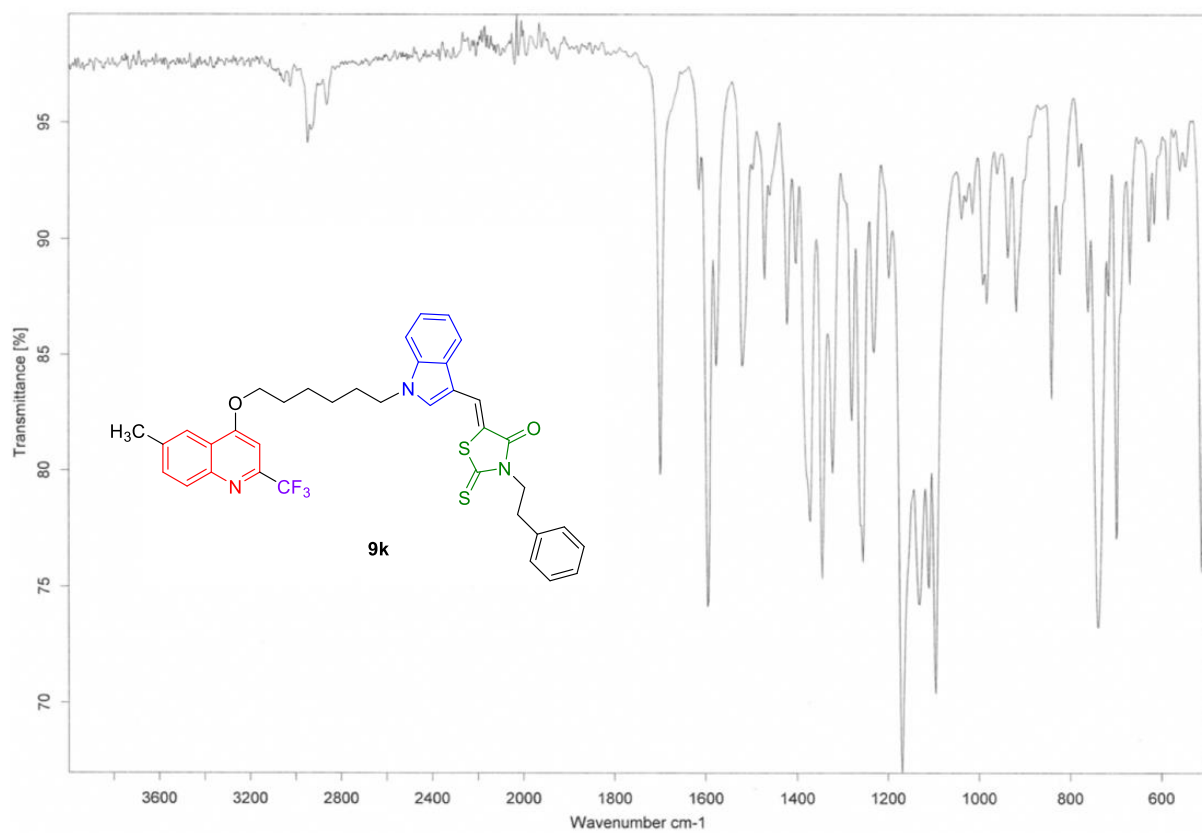

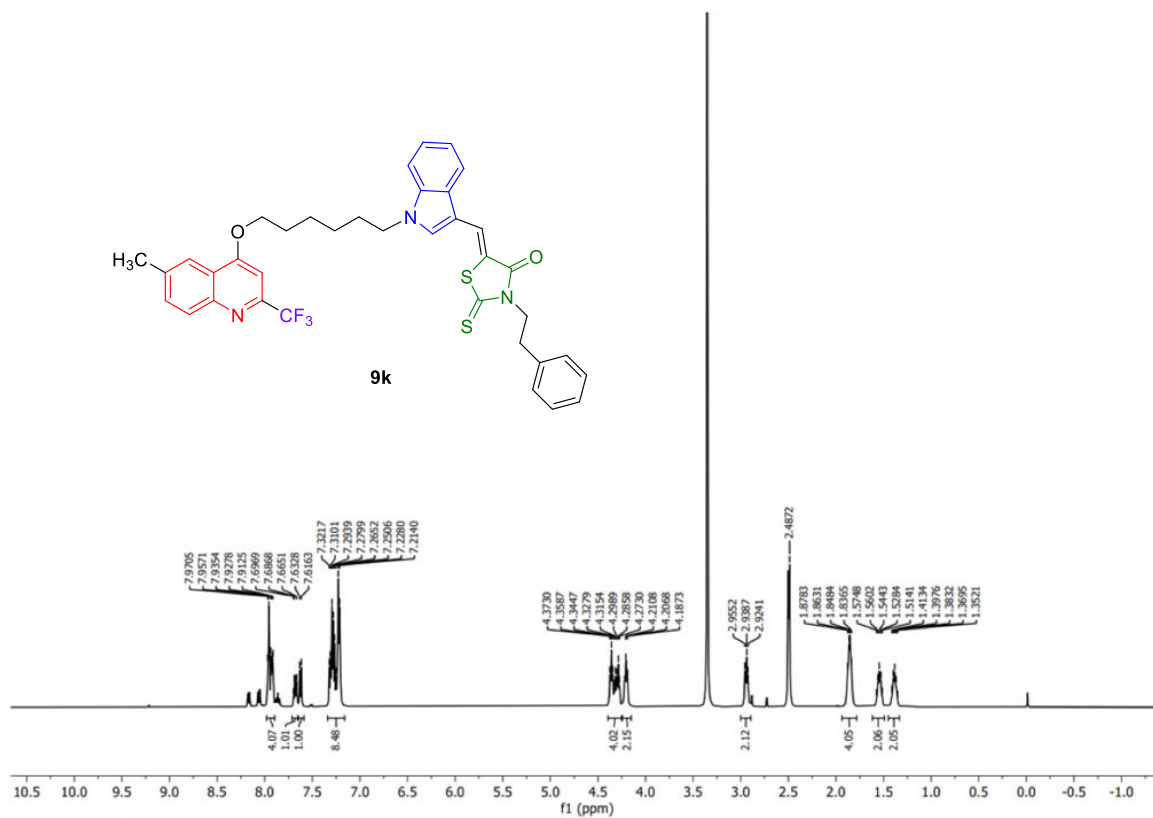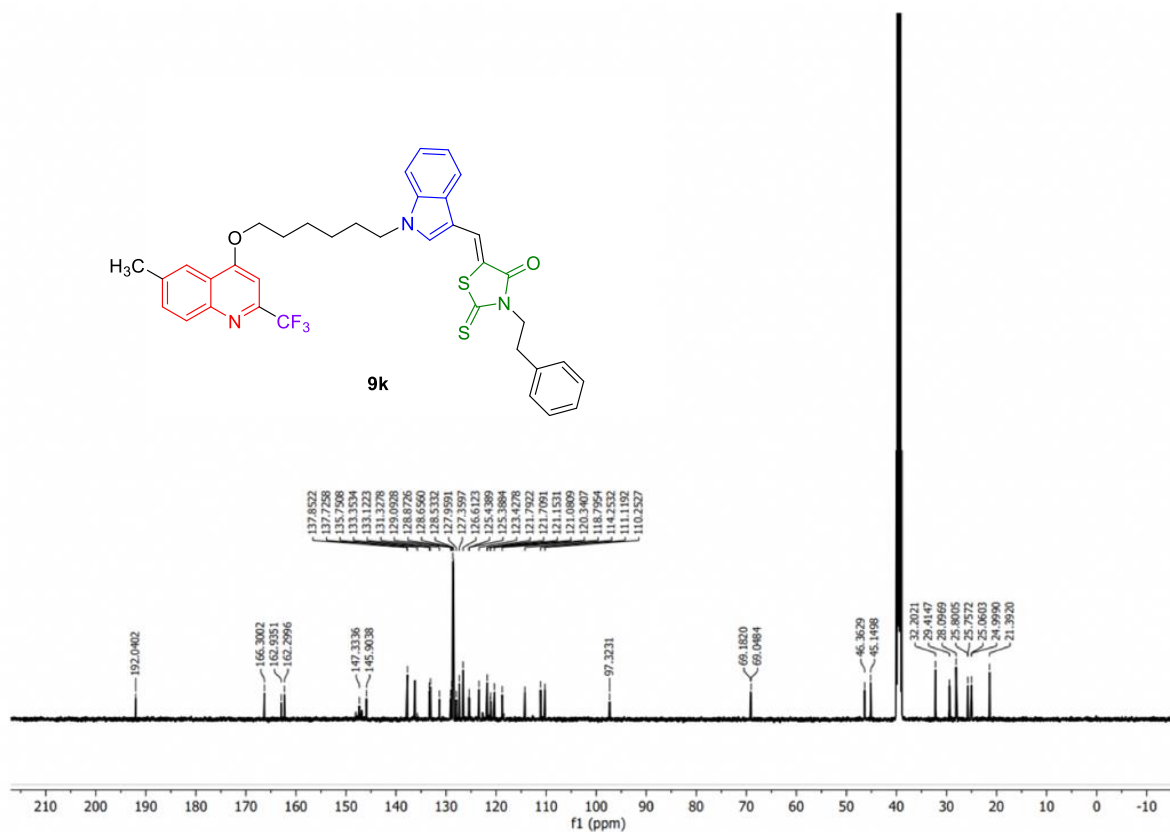

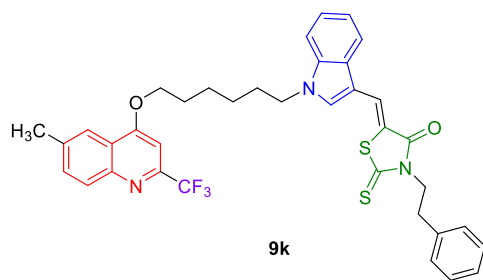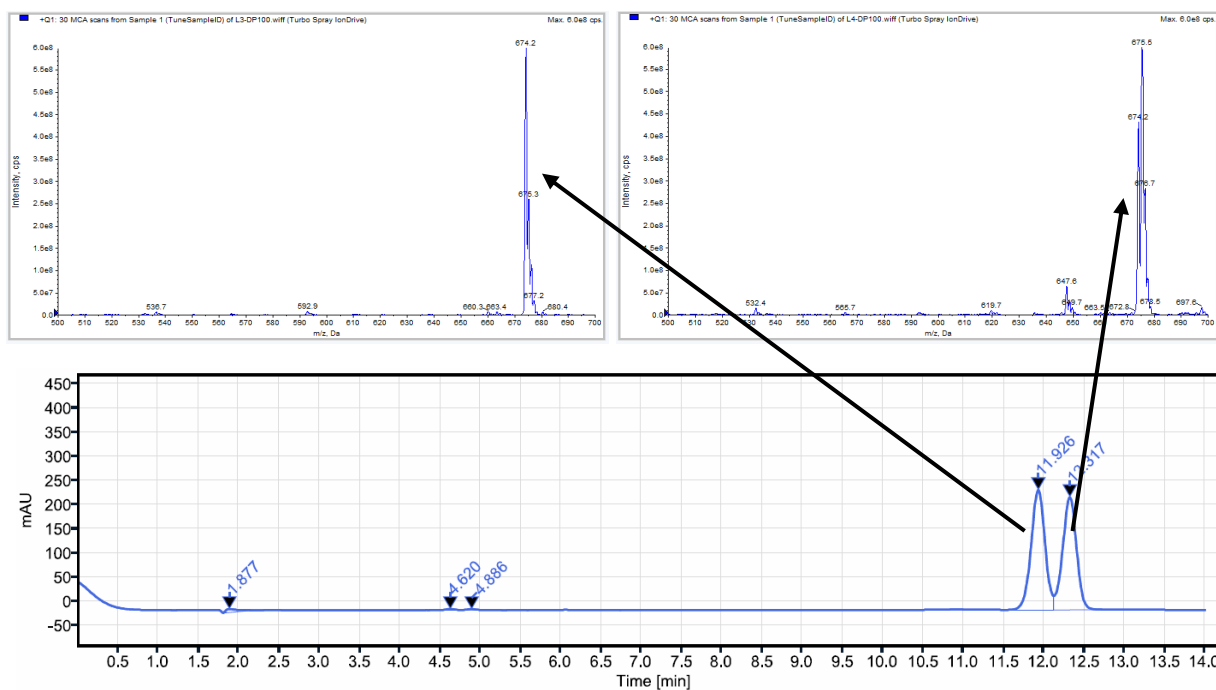

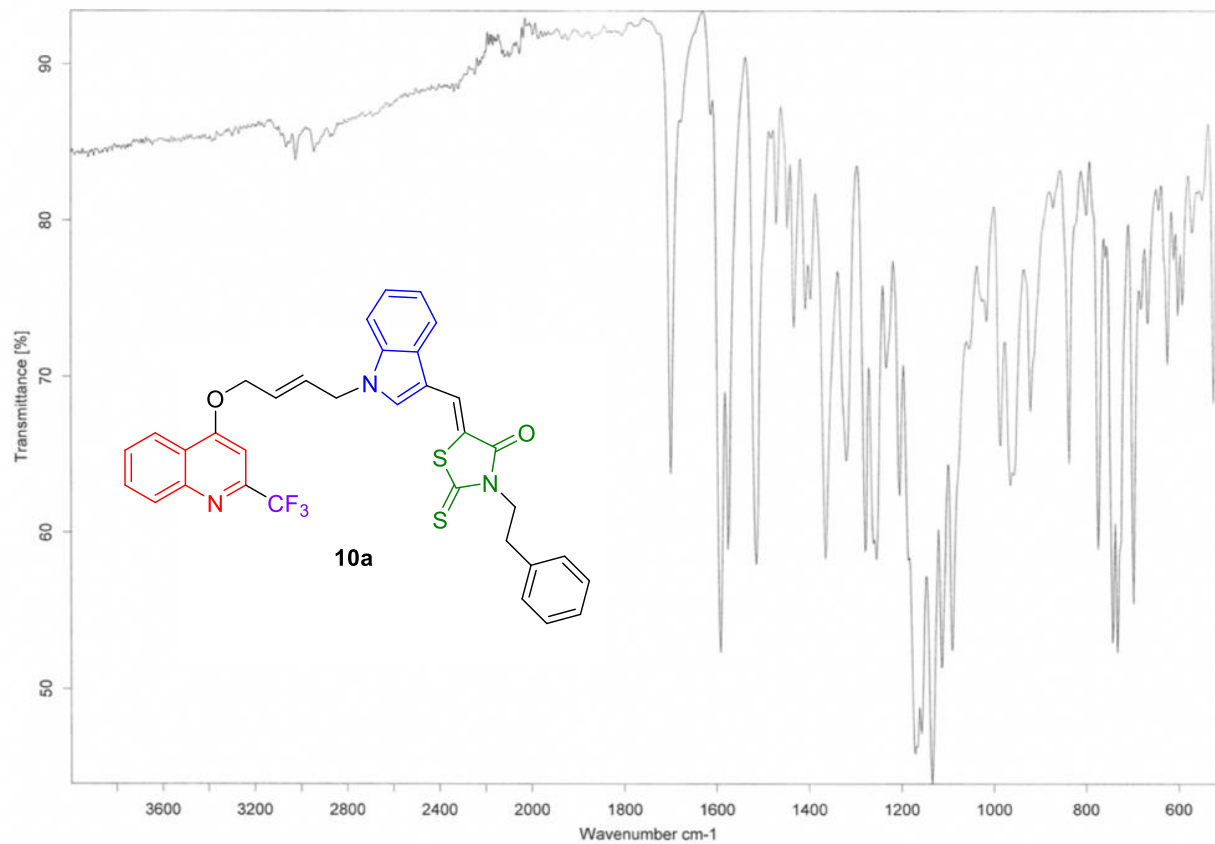

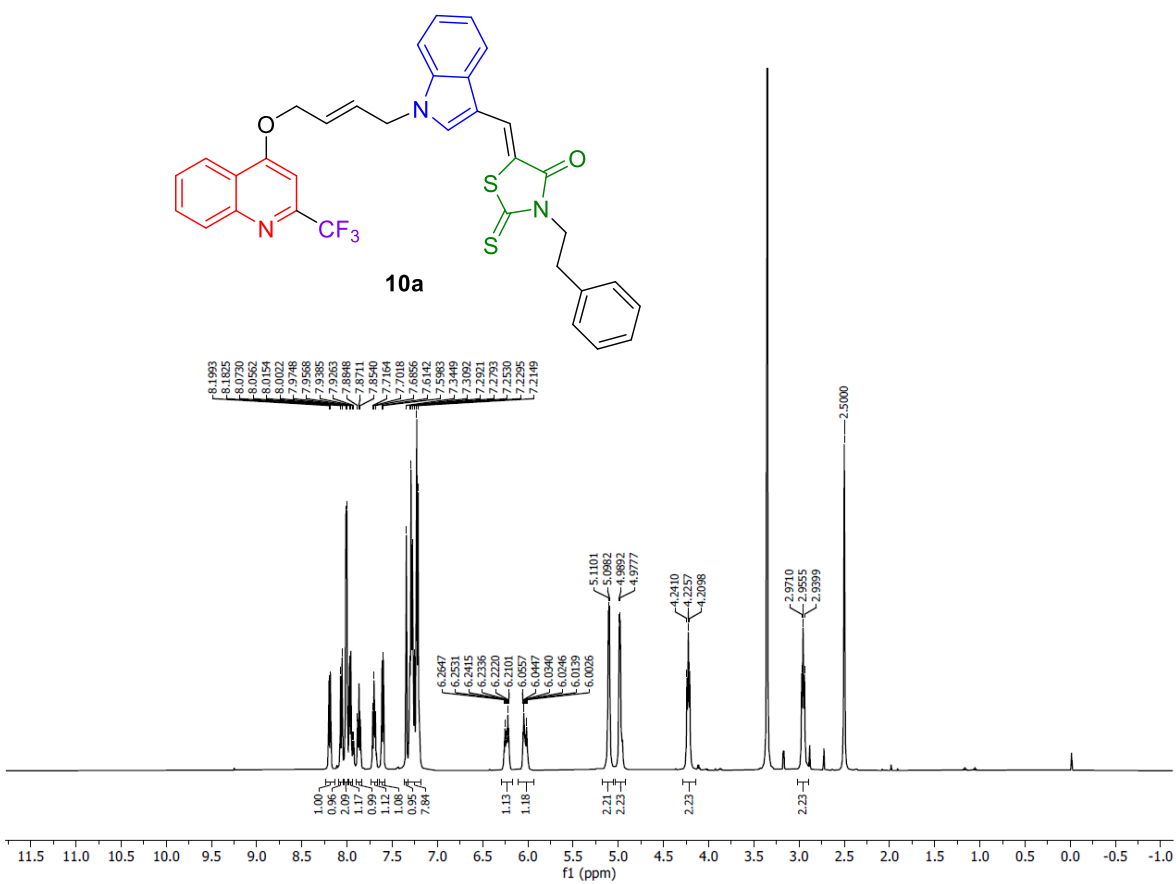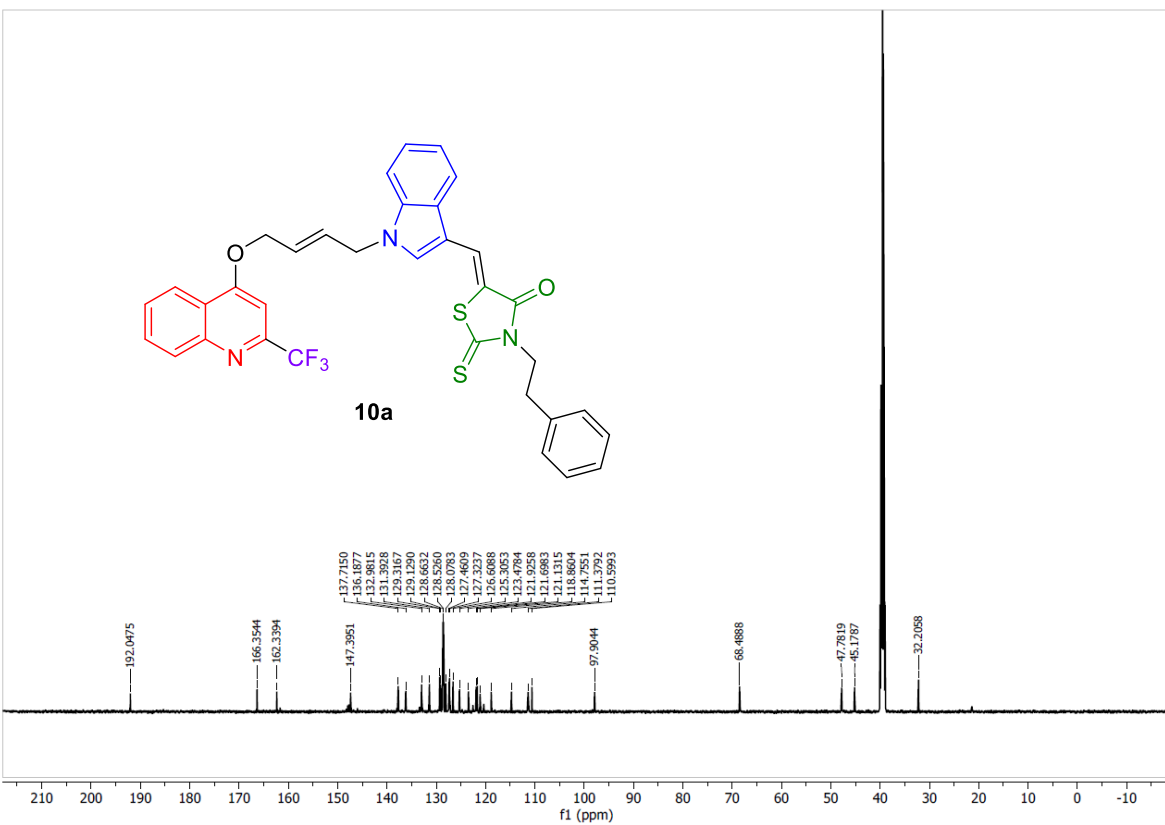

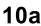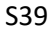

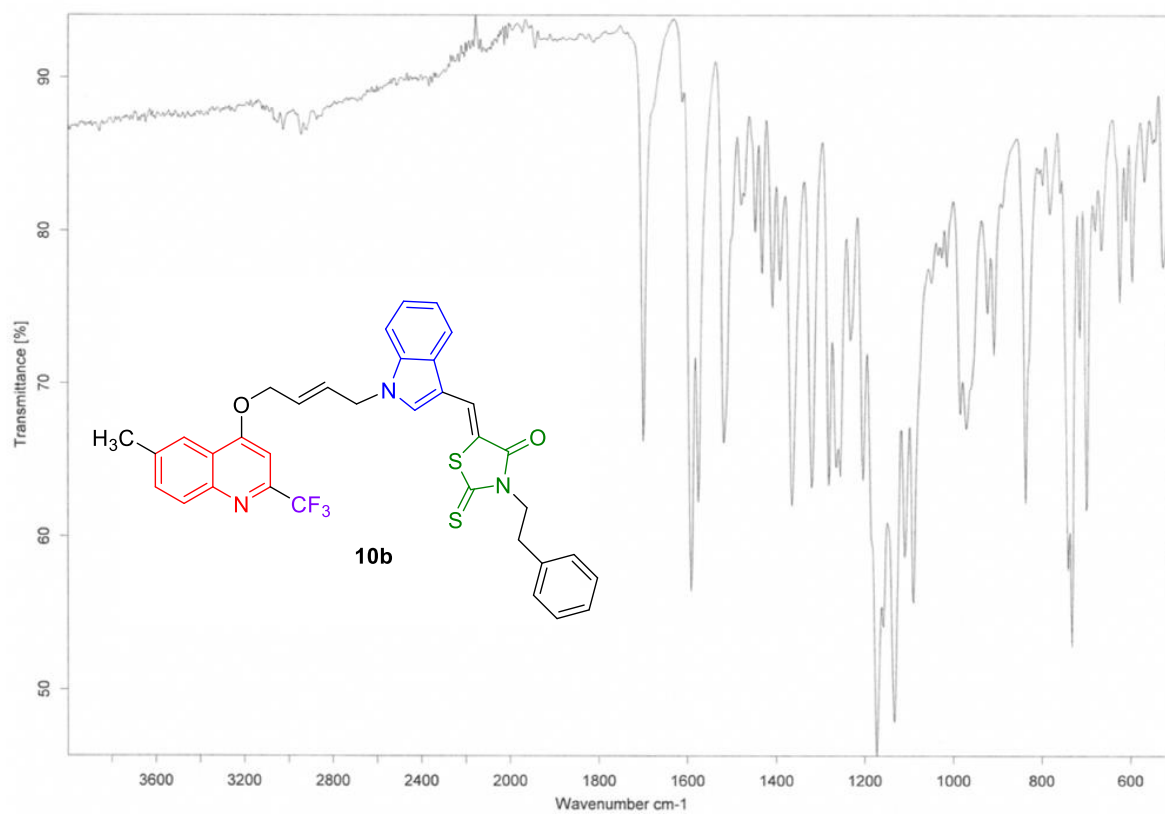



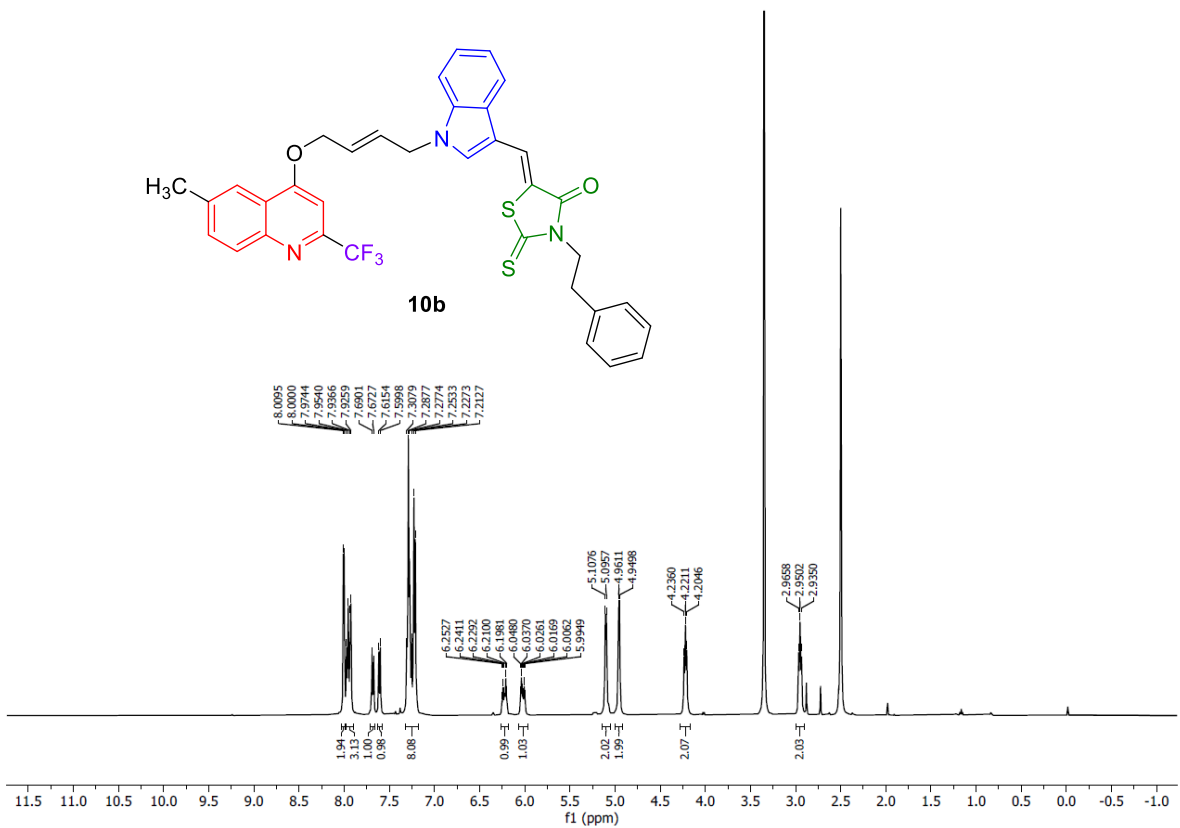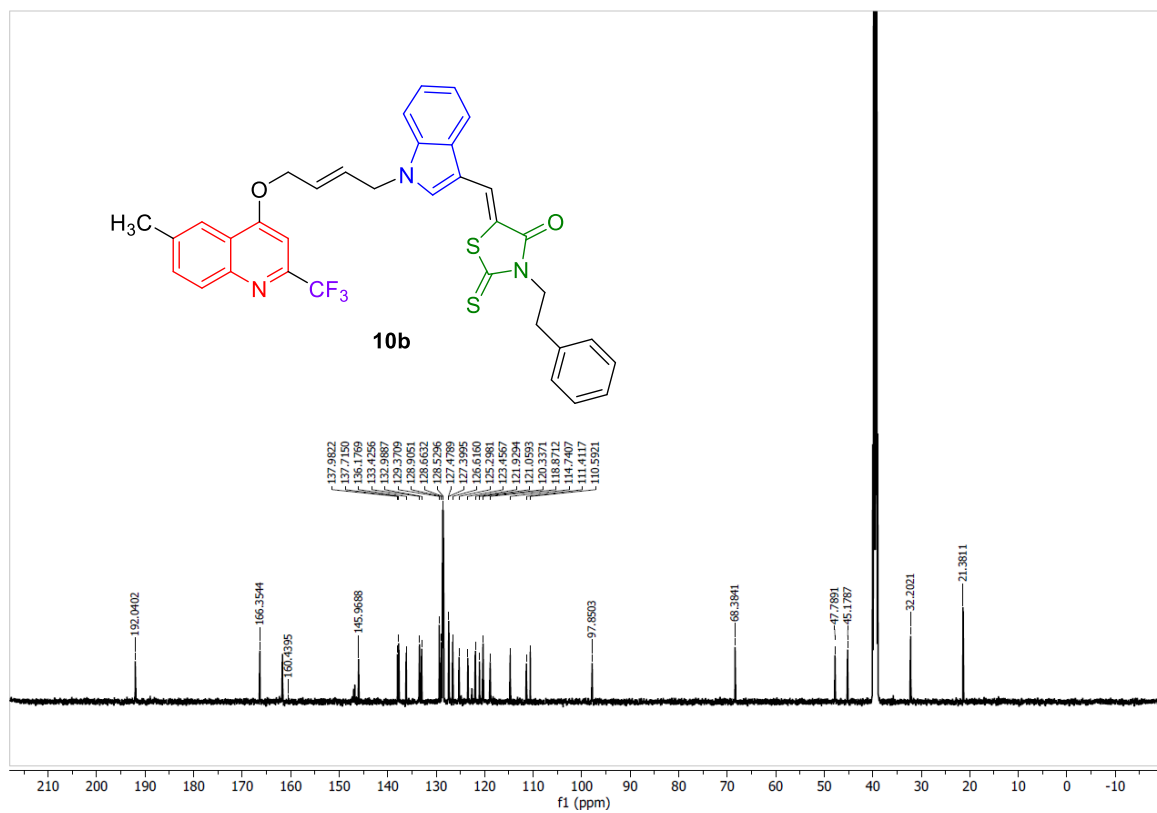

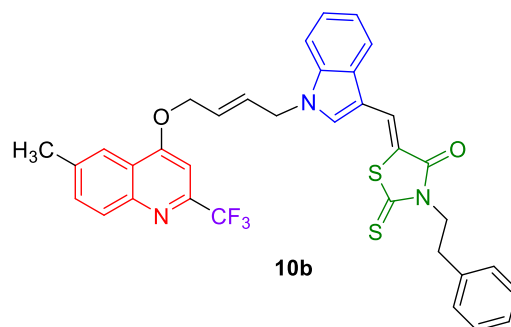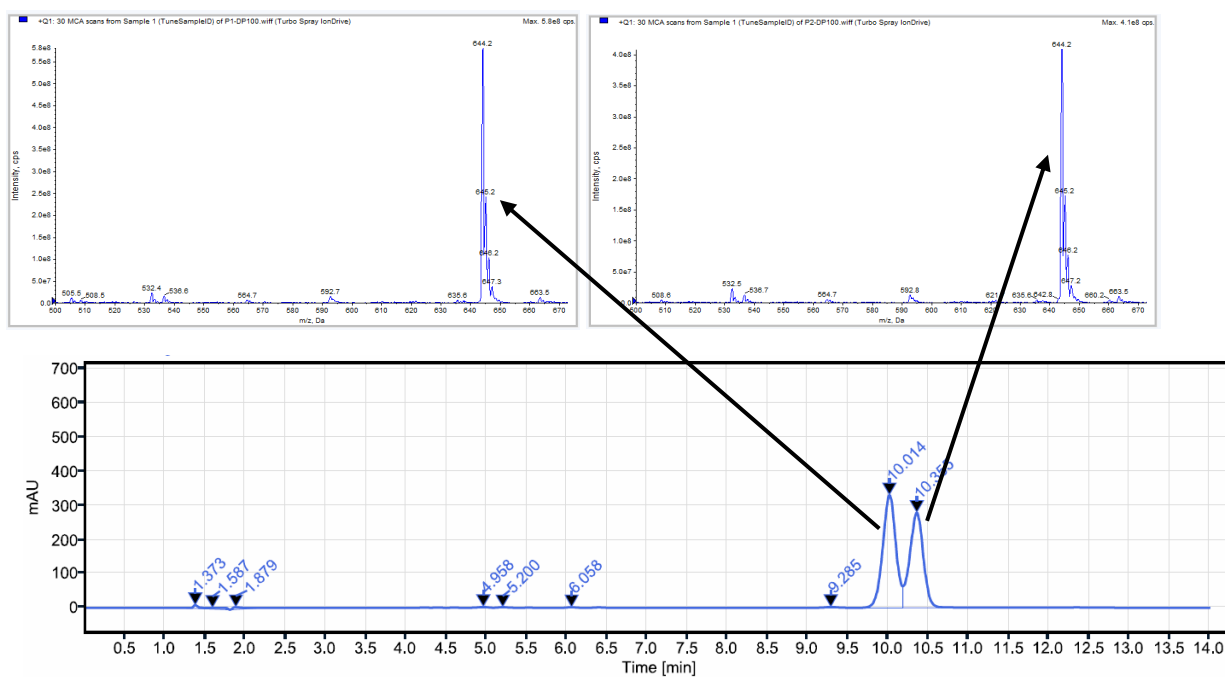

Supplement: s1 [file s1]
